# Supplementary material for: High-resolution Beijing MST radar detection of tropopause structure and variability over Xianghe (39.75° N, 116.96° E), China
Source: Copernicus journal article supplement (doi:10.5194/angeo-2018-137), 2019-01-23
Supplement: Supplementary file [file angeo-2018-137-AC1-supplement.pdf]

***Interactive comment on “High-resolution Beijing MST radar detection of tropopause structure and variability over Xianghe (39.75° N, 116.96° E), China” by Feilong Chen et al.***

Anonymous Referee #1

Received and published: 21 February 2019

Summary

Chen and co-authors use a VHF wind-profiling radar to examine the structure and variability of the tropopause over Xianghe, China with high temporal resolution. The authors use the gradient of the return power to identify the radar tropopause (RT) and compare with lapse-rate tropopauses (LRT) calculated from radiosondes which are launched some 45km away. The RT and LRT agree fairly well: the authors speculate that the non-perfect correlations are due to the seasonal movement of the sub-tropical jet. Chen and co-authors also investigate the tropopause sharpness and the relation between RT and the 2PVU dynamical tropopause and briefly mention the synoptic meteorology likely contributing to the similarities and differences between these tropopause definitions.

As Chen and co-authors cite in their manuscript, there have been several papers discussing the structure of the RT at varying latitudes in recent years. It seems that there is a bit of a renaissance in papers on this subject following the early study of Gage & Green (1979). The ability of VHF radars to sample sub-diurnal tropopause structure still must be of interest to the community.

Furthermore, the latitude of Xianghe at 40N is interesting for sub-diurnal and synoptic-scale tropopause variability given the seasonal movement of the sub-tropical jet of-ten creating two tropopauses which allows for significant stratosphere-troposphere ex-change. Unfortunately, Chen and colleagues choose to reject any analysis of the second, higher, tropopause in this paper which would have added significant interest to their analysis. As such, as it stands, this paper contains little new or interesting science.

I would therefore like the authors to implement the following recommendations in order to increase the scientific value and interest of their study.

Paper references are given at the end.

**Response:**

We really thank you for the helpful and constructive comments, which will be of great useful for this article. We hope that the reviewers will be satisfied with our responses and revisions. Our responses are in different color style (reviewer's comments are shown in black and our response in blue type).

Response regarding to the comment: ‘The RT and LRT agree fairly well: the authors speculate that the non-perfect correlations are due to the seasonal movement of the sub-tropical jet’. Statistically, our results found that the agreement between the RT and LRT height is similarly well during different seasons. We speculate that the relatively poor agreement between the RT/LRT and PVT in summer and late autumn is probably due to the seasonal movement of the sub-tropical jet.

Regarding the second tropopause, detailed responses are given below.

Regarding the scientific value:

Firstly, this paper used the latest data set of Beijing MST radar (more than 5 years since the routine operation of the radar) to study the high-resolution tropopause structure over Xianghe and then compared it with LRT and PVT. The results of this paper are of great guiding significance to readers who want to make use of the Beijing MST data to study various interesting topics (especially the tropopause variation).

Secondly, there are few statistical studies on the tropopause structure at near 40N with high temporal resolution. By comparing with LRT, we verified the potential of Beijing MST radar to identify tropopause. Diurnal variations of the tropopause with high temporal resolution are also analyzed. The echo power intensity, wind field intensity and wind data acquisition rate near the tropopause are also analyzed.

Major Comments

1) Line 101. You write that you will focus on the first (lowest) tropopause here. Yet I would argue that by neglecting the second tropopause, you are majorly limiting the value of your science. For example, by also characterising the second tropopause, you would likely answer some of your speculations regarding the differences between RT, LRT which you make in the Conclusions. Examining the seasonal variations of both tropopauses with radar would be a useful contribution to the literature and should be done in this paper.

**Response:**

Dear reviewer, the identification and observation of the second tropopause (characterized by tropical features and located near 16 km) is not considered by both the RT definition and LRT definition. The second tropopause (if it existed) can be well detected by radiosonde soundings. However, the low mode observations of Beijing MST radar have a limited highest detectible altitude of ~13-14 km (in vertical direction), thus the routine second tropopause is impossible to be detected under low mode observation. The middle mode observations of Beijing MST radar can reach as high as 24 km, but its altitude resolution is relatively poor with value of 600 m, while the resolution in low mode is 150 m. Thus, the middle mode data is not appropriate to be used to detect high resolution tropopause structure, otherwise will lead to a large error by the limited altitude resolution.

Given that we focused on the first tropopause structure using both the RT and LRT definitions, some responses are needed regarding the differences between RT and LRT. The second tropopause structure may hardly an important factor causing the differences between RT and LRT. As mentioned in the manuscript (discussion section) that some specific meteorological processes can lead to the ambiguities and indefiniteness in thermal and radar definitions, such as fronts, cyclones or typhoons, and folding. Such ambiguities often result in large difference in altitude between the RT and LRT. In addition, when multiple temperature inversion layers (sometimes can be called as multiple tropopauses, sometimes can not, depending on if the inversion layers meet the

WMO LRT definition) occurred below 16 km, the RT generally matched the lower part and LRT often matched the upper part, such as the double layers of enhanced echo power shown in Figure 3 on 4 and 5 February 2012.

2) Line 230 regarding the low correlations during summer and autumn. Although the RT and PV tropopauses are both dynamical tropopause definitions, we would not always expect close agreement especially during the passage of cyclones. Still, these larger offsets during summer (Fig 6c) are interesting. Does this suggest that the 2PVU surface is not the best measure of a dynamical tropopause above Beijing during summer-time? Given that you only consider 'low-mode' tropopauses, maybe you are missing most of the summer high tropopauses (see Major Point 3 below) which may account for some differences? You should separate the tropopause data into cyclonic / anti-cyclonic conditions, as you should then discover the reasons for the difference – my expectation is that you should see closer agreement between the definitions during anti-cyclonic conditions than during cyclonic. Also, you should separate the data into single tropopause / double tropopause times to investigate the RT – PV tropopause relationships more fully.

**Response:**

Yes, these larger offsets during summer (Fig 6c) are probable suggest that the 2PVU surface is not the best measure of a dynamical tropopause above Beijing during summer-time. We consider that these differences are less related to the missing of summer high tropopause (second tropopause near ~16 km).

Firstly, during autumn and summer, most of the comparison data pairs located in the left-side of 1:1 line (Fig. 6c and 6d), indicating most of the RT are located higher than the 2PVU tropopause height.

Secondly, if the differences are closely associated to the missing of second tropopauses, the distribution of the scatter points in Figure 6c should be that: most of the comparison data pairs located in the right-side of 1:1 line.

Based on the comments and response above, we have added the following sentences in the revised manuscript (discussion section):

'The existing cyclones or anticyclones in the upper-troposphere (Wirth, 2000), of course, may also be an important cause of the significant asymmetric differences (most of the scattered points deviate significantly from the 1:1 line). This asymmetric differences, that is most of the RT are located higher than the 2PVU tropopause height, suggest that the 2PVU surface is not the best measure of a dynamical tropopause over Beijing during summer-time.'

Certainly, cyclonic and anti-cyclonic conditions may also be an important influence factor for the differences between RT and PVT (Wirth, 2001). More detailed discussion about the striking asymmetric differences in height between LRT/RT and PVT will not be given in this paper.

*Wirth, V.: Thermal versus dynamical tropopause in upper-tropospheric balanced flow anomalies. Quarterly Journal of the Royal Meteorological Society, 126(562), 299-317,*

2000.

3) Discussion section and Figure 12a. I am surprised that you can't detect the thermal (lapse-rate) tropopause in the radiosonde profile at 16km. In such cases, as your radar 'low mode' doesn't reach high enough, you should switch to analysing 'mid-mode' to find the radar tropopause. On line 300 you say that the 16km inversion is the 'sec-ond tropopause' but clearly it's the first tropopause, because it is the lowest altitude tropopause. Presumably on this day, you are observing a tropical-like atmosphere with a very high tropopause. You should be aware that at a similar latitude to the Beijing radar is the MU radar in Shigaraki, Japan (35N), where high-time resolution radiosonde and radar analyses over many decades have demonstrated the very high summer-time radar and radiosonde tropopauses (first tropopause) at altitudes above 15km (please refer to Tsuda et al., 1991; Hermawan et al., EPS, 1998; Alexander & Tsuda, JTech, 2008, for further details). You need to include analysis of your higher-altitude tropopause in your study, regardless of whether it's the first or second tropopause.

**Response:**

We thought about this a lot during this statistical study.

The inversion layer near 16 km or higher is indeed meet the LRT definition. However, considering that the radar station is located at the middle latitude of 40N and the mechanism of formation of the second tropopause (Pan et al., 2004; Randel et al., 2007; Pan et al., 2009), the inversion height at a height of ~16km (or higher) over the radar station is the second tropopause with tropical characteristics. In fact, the routine occurred second tropopause is almost located near 16km altitude throughout the seasons. In a word, no matter whether the inversion layer at ~16 km is the first tropopause or the second tropopause, such tropical featured higher tropopause will not be considered and studied here.

Therefore, we explain in the introduction that this study only focuses on the first tropopause below 16km, no matter whether it exists or not. Indeed, the routine presented higher tropopause (second tropopause near 16km) in different seasons throughout the year is worthwhile for studying. In view of the limitation of the altitude resolution of the middle mode data in the Beijing MST radar (with value of 600m), it was not used to study the tropical featured second tropopause near 16km, especially for the statistical study. The case observation of the second tropopause near 16km using the meddle mode is worthy of future study.

In order to avoid misguidance and to fit in with the main research focus of this paper, we have indicated in many places that the research focus of this paper is the first tropopause under 16km (as long as it exists).

For example, one sentence has been modified in the introduction section of the revised manuscript: 'In the present study, we focus only on the first tropopause (below 16 km) which will be referred to as 'tropopause' hereafter'.

In addition, the figure 12 and the figure caption have also been modified accordingly:

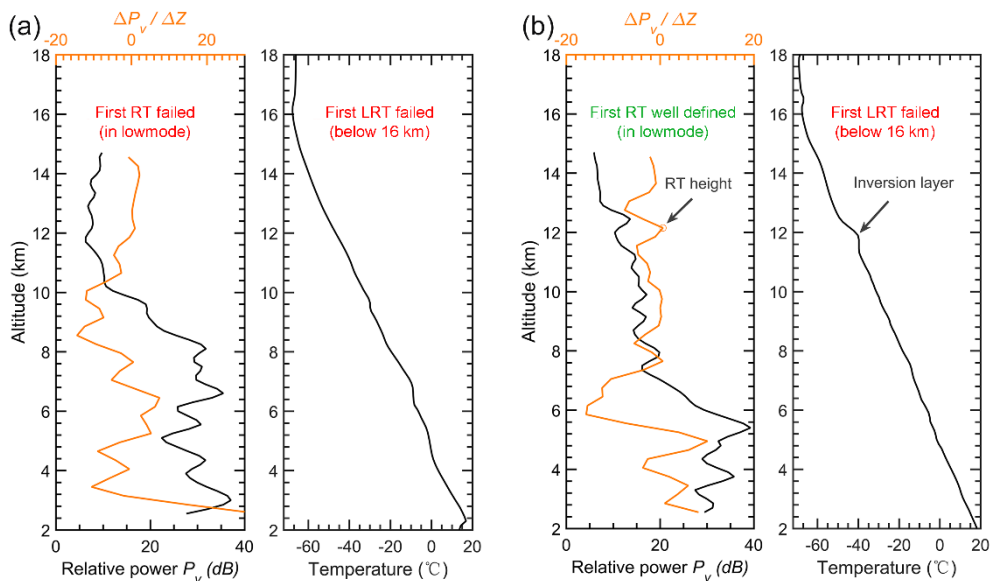

**Figure 12.** Example profiles of radar echo power and radiosonde temperature that (a) both the RT and LRT definitions fail due to the continuing decrease in temperature on 00 UTC 7 July 2012 and (b) the temperature inversion layer failed to meet the LRT definition but well defined in RT definition on 12 UTC 02 August 2012. Please note that we only consider the conditions below 16 km.

*Pan, L. L., Randel, W. J., Gary, B. L., Mahoney, M. J., and Hints, E. J.: Definitions and sharpness of the extratropical tropopause: A trace gas perspective. Journal of Geophysical Research, 109, D23103, doi:10.1029/2004JD004982, 2004.*

*Pan, L. L., W. J. Randel, J. C. Gille, W. D. Hall, B. Nardi, S. Massie, V. Yudin, R. Khosravi, P. Konopka, and D. Tarasick: Tropospheric intrusions associated with the secondary tropopause, Journal of Geophysical Research, 114, D10302, 2009.*

*Randel, W. J., Seidel, D. J., and Pan, L. L.: Observational characteristics of double tropopauses. Journal of Geophysical Research, 112, D07309, 2007.*

#### Minor Comments

1) Line 51: 'Radiosonde sounding. . . impractical [spelling!] in severe weather'. This isn't really true. The sentence suggests to the reader that radiosondes cannot be launched in heavy rainfall yet they are in the tropics, nor in the cold, yet they are in the polar regions. I suggest removing this sentence.

#### Response:

Really thanks for pointing out the flaw. The corresponding sentence has been removed.

2) Line 62. So the best way forward is to create a 'blended tropopause' for the globe as Wilcox et al. (QJRM 2011) did. I suggest you read and cite this paper here.

#### Response:

Really thanks for recommending this valuable paper. This paper has been cited in the revised manuscript. Following sentence has been added in the revised manuscript: 'Creating a 'blended tropopause' for the globe may probable a good way forward

(Wilcox et al., 2011).’

3) Line 63. Before discussing VHF radars, you should briefly discuss the use of GPS radio occultation satellites which provide highly accurate, climatically stable measurements of temperature and thus of the tropopause. There are many papers on this subject which you can easily find. Some valuable ones include: Schmidt et al., ACP 2005; Son et al., JGR 2011.

**Response:**

Yes, it is necessary to briefly discuss the use of GPS radio occultation satellites to study the tropopause. The corresponding references have been cited in the revised manuscript. Following sentence is added in the revised manuscript: ‘In addition, the data of GPS radio occultation satellites is also an effective way and commonly applied to study tropopause (e.g. Schmidt et al., 2005; Son et al., 2011).’

4) Line 71. I cannot find the paper Alexander et al (2012). I think you are accidentally quoting the ACPD submitted manuscript paper rather than the final ACP paper. You should cite the final, ACP paper as: Alexander et al. (2013). See the ‘References’ section below for the proper reference.

**Response:**

Really thanks for pointing out the flaw. It has been corrected in the revised manuscript.

5) Line 102. For what purpose is the high temporal resolution ‘still insufficient’? Why do we care about obtaining the tropopause at hourly time-scales?

**Response:**

Yes, the expression of this sentence is inaccurate. We have deleted the sentence in the revised manuscript.

6) Line 209, sentence: ‘Fig 4 explicitly indicates the good capability of the Beijing MST radar. . .’ No it doesn’t. Figure 4 shows that the radar tropopause determined by this radar shows reasonable agreement with radiosonde-derived lapse rate tropopauses and that the differences are mostly under 1km.

**Response:**

Yes, the expression of this sentence is inaccurate. The corresponding sentence has been changed to ‘Fig. 4 explicitly shows that the RT derived by the Beijing MST radar agrees reasonably well with the LRT throughout the seasons.’ in the revised manuscript.

7) Line 245: I can’t see these differences clearly in Figure 7. On top of your dot points in Figure 7, please plot the mean and standard deviations at each altitude. Please describe in the text what new information this plot shows – after all, the community well knows about the sudden jump in  $N^2$  at the tropopause and the jump in radar power too.

**Response:**

Yes, you are right. It is necessary to plot the mean and standard deviations in each panel of Figure 7. Really thanks for your comments. The mean values and error bars are plotted in Figure 7 in the revised manuscript.

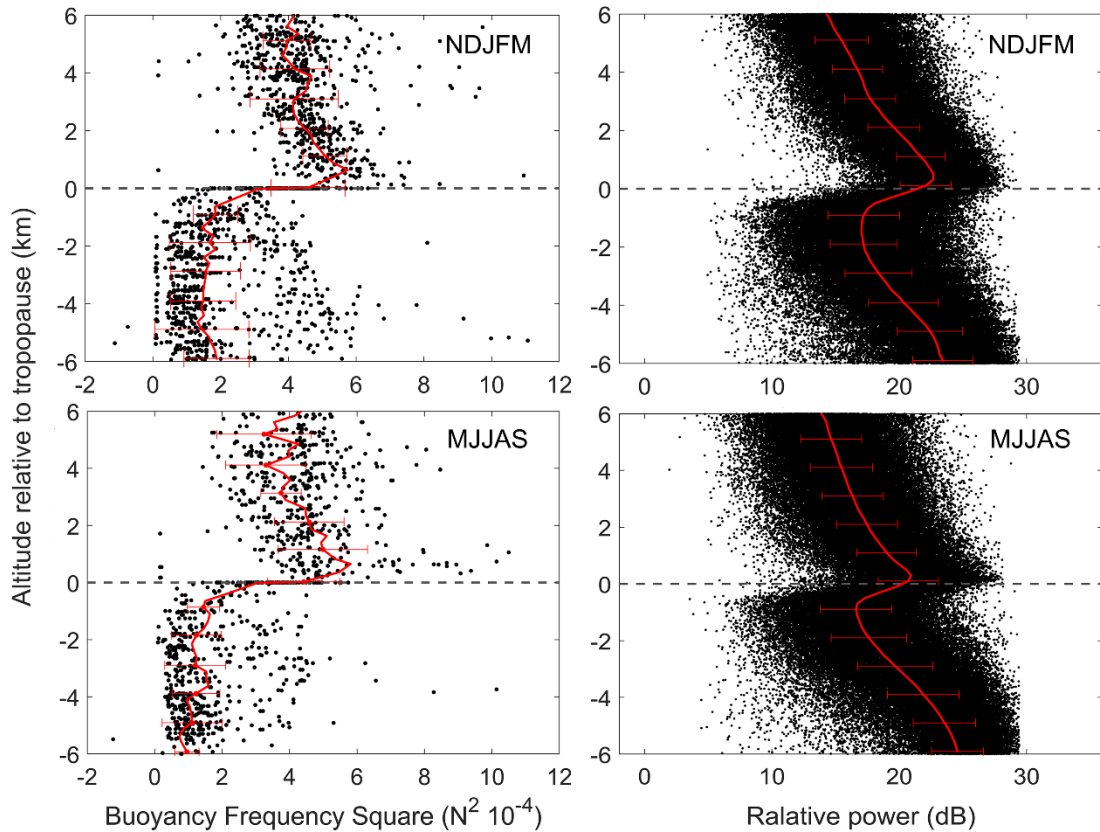

Indeed, the sudden jump in both the static stability and radar echo power upon the tropopause is commonly well known. Several other features seen from the figure have been reported in the revised manuscript: ‘The degree of sudden increase in echo power is more gradual than that in static stability. The amplitude of the sudden increase in radar power experienced a slightly larger during NDJFM than that during MJJAS (red lines of right panels). Another interesting feature in the lower-stratosphere is that both the static stability and radar power points show less disperse during NDJFM than that during MJJAS.’.

8) Line 312 onwards (comments about Figure 12b and the inversion at 12km). A simple way around this is to set some threshold in your radar tropopause algorithm to avoid these small peaks. And again, you should switch to ‘mid-mode’ analysis here.

**Response:**

Because the radar echo power is associated with various situations. Threshold may not be appropriate for Beijing MST radar. Furthermore, the phenomenal of enhanced gradient in radar echo power is real, and it just correspond well to the relatively weak inversion of radiosonde temperature near 12 km.

9) Line 326 and comments about cyclones / anti-cyclones. This is easy to investigate and should be done rather than just speculating. See my Major Comments above.

**Response:**

Dear reviewer, really thanks for your comments. Certainly, cyclonic and anti-cyclonic conditions are interesting topics. But it will not be studied in detail in this paper and

this is beyond the scope of this article.

Technical:

1) Line 250: Avoid using the word 'inversion' unless referring to the increase in temperature with altitude

**Response:**

Yes, you are right. The corresponding sentence has been modified to 'Clearly, both profiles exhibit a sudden increase with height near the tropopause' in the revised manuscript.

2) Figure 3. I can't see the green asterisks. Please choose a different colour to make this clear

**Response:**

Really thanks for pointing out the flaw. Fig.3 has been corrected in the revised manuscript.

3) Figure 7. The means (and standard deviations) should be overplotted

**Response:**

Really thanks for pointing out the flaw. The means and standard deviations are plotted in each panel of Figure 7.

4) Figure 8. Please clarify the x-axis 'Data acquisition rate'. Is this the percentage of (useful) signal returned, or is it the percentage of wind data collected or what?

**Response:**

Really thanks for your comments. Data acquisition rate indicates the effective wind data. It has been corrected in the 3.3 section and the figure caption in the revised paper.

5) Figure 12, as discussed in the Minor Comments above, you should be switching to 'mid-mode' to identify the high-altitude tropopause, which in these instances is still the 'first tropopause'

**Response:**

As mentioned above and explained in many parts of the article, we only focus on the tropopause below 16km. The tropopause near 16 km or above is not subject to consideration (statistical analysis). For example, one sentence in the introduction section of the revised manuscript: 'In the present study, we focus only on the first tropopause (below 16 km) which will be referred to as 'tropopause' hereafter'.

References:

Alexander, S.P., Murphy, D.J., and Klekociuk, A.R., 2013, High resolution VHF radar measurements of tropopause structure and variability at Davis, Antarctica (69° S, 78° E), Atmos. Chem. Phys., 13, 3121-3132, doi:10.5194/acp-13-3121-2013

Alexander, S. P. and Tsuda T., 2008, 'High Resolution Radio Acoustic Sounding System (RASS) Observations and Analysis up to 20km', Journal of Atmospheric and Oceanic Technology, 25, 8, p1383-1396, doi: 10.1175/2007JTECHA983.1



Hermawan, E., and T. Tsuda, 1999: Estimation of turbulence energy dissipation rate and vertical eddy diffusivity with the MU radar RASS. *J. Atmos. Solar-Terr. Phys.*, 61, 1123–1130.

Schmidt, T., Heise, S., Wickert, J., Beyerle, G., Reigber, C., 2005, GPS radio occultation with CHAMP and SAC-C: Global monitoring of thermal tropopause parameters, *Atmos. Chem. Phys.*, 5, 1473–1488

Son, S.-W., Tandon, N.F., Polvani, L.M, 2011, The fine-scale structure of the global tropopause derived from COSMIC GPS radio occultation measurements, *J. Geophys. Res.*, 116, D20113, doi: 10.1029/2011JD016030

Tsuda, T., T. E. VanZandt, M. Mizumoto, S. Kato, and S. Fukao, Spectral analysis of temperature and Brunt Väisälä frequency fluctuations observed by radiosondes, *J. Geophys. Res.*, 96, 17265–17278, 1991.

Wilcox L.J., Hoskins B.J., Shine K.P. 2012. A global blended tropopause based on ERA data. Part I: Climatology. *Q. J. R. Meteorol. Soc.* 138: 561–575. DOI:10.1002/qj.951.

[Really thanks for recommending these valuable references.](#)

[Thank you again for your help with improving the paper.](#)

[Best regards](#)
