# Supplementary material for: High-resolution Beijing MST radar detection of tropopause structure and variability over Xianghe (39.75° N, 116.96° E), China
Source: Copernicus journal article supplement (doi:10.5194/angeo-2018-137), 2019-01-23
Supplement: Supplementary file [file angeo-2018-137-AC6-supplement.pdf]

1           **High-resolution Beijing MST radar detection of tropopause structure and**  
2                           **variability over Xianghe (39.75° N, 116.96° E), China**

3           Feilong Chen<sup>1</sup>, Gang Chen<sup>1\*</sup>, Yufang Tian<sup>2</sup>, Shaodong Zhang<sup>1</sup>, Kaiming Huang<sup>1</sup>,  
4                                           Chen Wu<sup>1</sup>, Weifan Zhang<sup>1</sup>

5           <sup>1</sup>School of Electronic Information, Wuhan University, Wuhan 430072, China.

6           <sup>2</sup>Key Laboratory of Middle Atmosphere and Global Environment Observation, Institute  
7           of Atmospheric Physics, Chinese Academy of Sciences, Beijing 100029, China.

8           \*Corresponding author: Gang Chen (g.chen@whu.edu.cn)

9  
10          **Abstract.**

11          As a result of partial specular reflection from the atmospheric stable layer, the radar  
12          tropopause (RT) can simply and directly be detected by VHF radars with vertical  
13          incidence. Here, the Beijing MST radar measurements are used to investigate the  
14          structure and the variabilities of the tropopause in Xianghe, China with a temporal  
15          resolution of 0.5 hour from November 2011 to May 2017. High-resolution radar-  
16          derived tropopause is compared with the thermal lapse-rate tropopause (LRT) that  
17          defined by the World Meteorological Organization (WMO) criterion from twice daily  
18          radiosonde soundings and with the dynamical potential vorticity tropopause (PVT) that  
19          defined as the height of 2 PVU surface. During all the seasons, the RT and the LRT in  
20          altitude agree well with each other with a correlation coefficient of  $\geq 0.74$ . Statistically,  
21          weaker (higher) tropopause sharpness seems to contribute to larger (smaller) difference  
22          between the RT and the LRT in altitude. The RT agrees well with the PVT in altitude  
23          during winter and spring with a correlation coefficient of  $\geq 0.72$ , while the correlation

24 coefficient in summer is only 0.33. As expected, the monthly mean RT and LRT height  
25 both show seasonal variations. Lomb-Scargle periodograms show that the tropopause  
26 exhibits obvious diurnal variation throughout the seasons, whereas the semidiurnal  
27 oscillations are rare and occasionally observed during summer and later spring. Our  
28 study shows the ~~good capability~~potential of the Beijing MST radar to determine the  
29 tropopause height, as well as present its diurnal oscillations.

30 **Key words:** VHF radar; MST radar; tropopause; diurnal oscillation.

31

## 32 **1. Introduction**

33 The tropopause marks a transition zone separating the well-mixed convectively  
34 active troposphere from the stably stratified and more quiescent stratosphere. Its  
35 structure and variability is characterized by large changes in thermal (e.g., lapse rate),  
36 dynamical (e.g., potential vorticity), and chemical properties (e.g., ozone and water  
37 vapor) and hence acts as a key role for the stratosphere-troposphere exchange (STE)  
38 processes (Hoinka, 1998; Seidel et al., 2001). The height of the tropopause depends  
39 significantly on the latitude, with about 17 km near the equator and less than 9-10 km  
40 at polar latitudes (Ramakrishnan, 1933). Over subtropical latitudes with the presence  
41 of subtropical jet, where the tropopause experiences rapid change or breaking,  
42 tropopause folding events are commonly observed (Pan et al., 2004). Climatologically,  
43 the altitude of the tropopause represents the seasonal variation of the flux of  
44 stratospheric air intruding into the troposphere (Appenzeller et al., 1996). Moreover,  
45 the tropopause height trends can be a sensitive indicator of anthropogenic climate

46 change (Sausen and Santer, 2003; Santer et al., 2003a; Añel et al., 2006).

47 A variety of ways are available to determine the extratropical tropopause.

48 Radiosonde sounding is the most commonly used to define the thermal tropopause

49 (hereafter referred to as LRT) based on temperature lapse-rate (WMO, 1957). The

50 thermal definition of tropopause can be applied globally and the tropopause height

51 easily be determined from one individual profile (Santer et al., 2003). ~~Radiosonde~~

52 ~~sounding, however, is impracticable in severe weather conditions such as intense~~

53 ~~rainfall and cold air outbreak.~~ Another feasible definition is to use a specific potential

54 vorticity (PV) surface to represent the dynamical tropopause (hereafter referred to as

55 PVT) (Reed, 1955; Hoskins et al., 1985). Dynamical definition has the advantage that

56 the PV is a conserved property (under adiabatic and friction-less conditions) of an air

57 mass (Hoskins et al., 1985; Bethan et al., 1996). Values in the range 1-4 PVU (1 PVU=

58  $10^6 \text{ m}^2 \text{ s}^{-1} \text{ K kg}^{-1}$   ~~$10^6 \text{ m}^2 \text{ s}^{-1} \text{ K kg}^{-1}$~~ ) are used in previous researches in the

59 Northern Hemisphere (e.g. Baray et al., 2000; Sprenger et al., 2003; Hoerling et al.,

60 1991). The threshold of 2 PVU surface is the most commonly used (Gettelman et al.,

61 2011). Dynamical definition, however, is not applicable near the equator, where the PV

62 tends to be 0 (e.g., Hoerling et al., 1991; Nielsen-Gammon et al., 2001). Creating a

63 blended tropopause globally may probably a good way forward (Wilcox et al., 2011).

64 In addition, the data of GPS radio occultation satellites is also an effective way and

65 commonly applied to study tropopause (e.g. Schmidt et al., 2005; Son et al., 2011).

66

67 As a result of partial specular reflection from stable atmospheric layer, the radar

68 tropopause (RT) can be well represented and identified by atmospheric radars operating  
69 at meter wavelength (VHF band) and directing at vertical incidence (Gage and Green,  
70 1979). Research activity increased remarkably following the first report on VHF radar  
71 detection of tropopause by Gage and Green (1979), for instance, the researches in  
72 middle latitudes (e.g. Hermawan et al., 1998), polar regions (e.g. Hall, 2013a), and  
73 tropical regions (e.g. Das et al., 2008; Ravindrababu et al., 2014). Several methods have  
74 been proposed to determine the tropopause height via radar echo power, including the  
75 largest gradient in echo power (Vaughan et al., 1995; [Alexander et al., 2012](#) [Alexander](#)  
76 [et al., 2013](#)), the maximum echo power (Vaughan et al., 1995; Hall et al., 2009), and  
77 the specific value of echo power (Gage and Green, 1982; Yamamoto et al., 2003). The  
78 method of the RT height determination used in this paper will be described in detail in  
79 next section.

80 The biggest advantage of the VHF radar measurements is the ability of continuous  
81 operation unmanned in any weather conditions. Of course, no definition of the  
82 tropopause is perfect. VHF radar system can only be limited to a few locations globally.  
83 A detailed review of the close relationship between these different tropopause  
84 definitions is provided by Alexander et al., (2012).

85 By means of the radiosonde, reanalysis, and satellite data available globally, long-  
86 term (annual or longer) variability in tropopause height has received extensive attention  
87 (e.g. Randel et al., 2000; Angell and Korshover, 2009; Son et al., 2011; Liu et al., 2014).  
88 However, short period (diurnal or semidiurnal) variability of the tropopause is hard to  
89 be examined by these measurements. In contrast, benefiting from the much higher

90 temporal resolution, radar definition of the tropopause provides good capability for  
91 studying the diurnal and semidiurnal variation in tropopause height. Earlier, Yamamoto  
92 et al., (2003) reported the capability of the Equatorial Atmospheric Radar to examine  
93 the diurnal variation of tropopause height. Then, the diurnal variability of the tropical  
94 tropopause was investigated in detail by Das et al., (2008) using the Indian Gadanki  
95 MST radar. Its diurnal variation over a polar latitude station was investigated by Hall  
96 (2013b). In the absence of pressure and temperature parameters, the evidence of  
97 atmospheric tides can be well represented by winds (e.g. Huang et al., 2015).

98 The tropopause structure in midlatitudes is different from that in other regions.  
99 Double tropopauses structure is a ubiquitous feature over mid-latitude regions near  
100 40°N (Pan et al., 2004; Randel et al., 2007). Strong evidence has revealed that the  
101 poleward intrusion of subtropical tropospheric air that occurred above the subtropical  
102 jet have resulted in the double structure (Pan et al., 2009). The higher part (second  
103 tropopause near ~16 km) is characterized by tropical features of cold and higher level,  
104 whereas the lower part (first tropopause near ~12 km) is characterized by polar features  
105 of warm and lower level. In the present study, we focus only on the first tropopause  
106 (below 16 km, if it exists) which will be referred to as ‘tropopause’ hereafter.

107 ~~So far, knowledge on the high temporal resolution (within 1 hour) structure and~~  
108 ~~variability of the midlatitude tropopause is still insufficient.~~ In this study, using more  
109 than 5 years of Beijing MST radar echo power measurements in vertical beam, we  
110 mainly focus on the high-resolution characteristics of the tropopause structure and their  
111 comparison with the simultaneous radiosonde and dynamical definitions. Another

112 important objective of this study is to examine the diurnal and semidiurnal variability  
113 of the tropopause. The observational characteristics of e.g. winds, echo power, and data  
114 acquisition rate near the tropopause layer are also presented in the paper.

115

## 116 **2. Data and Methods**

### 117 **2.1. Radar Dataset**

118 As an important part of the Chinese Meridian Project, two MST radar systems are  
119 designed and constructed to improve the understanding of the extratropical troposphere,  
120 lower stratosphere, and mesosphere (Wang, 2010), which are Wuhan and Beijing MST  
121 radars. The Beijing MST radar located in Xianghe, Hebei Province, China ( $39.75^{\circ}$  N,  
122  $116.96^{\circ}$  E, 22 m above sea level) was designed and constructed by the Institute of  
123 Atmospheric Physics, Chinese Academy of Sciences and started its routine operation  
124 since 20 October 2011 (Tian and Lu, 2017). The radar is a high power coherent pulse-  
125 Doppler radar operating at 50 MHz with the maximum peak power of 172 kW and the  
126 half-power beam width of  $3.2^{\circ}$ . Five beams are applied: one vertically pointed beam  
127 and four  $15^{\circ}$  off-zenith beams tilted to north, east, south, and west. In order to obtain  
128 the high-quality measurements from troposphere, lower stratosphere, and mesosphere  
129 simultaneously, the radar is designed to operate routinely in three separate modes: low  
130 mode (designed range 2.5--12 km), middle mode (10--25 km), and high mode (60--90  
131 km) with vertical resolutions of 150, 600, and 1200 m, respectively. Under the routine  
132 operation, the 15-min break is followed by the 15-min operation cycle (5 min for each  
133 mode). As a result, the time resolutions of the low, middle, and high mode

134 measurements are all 30 min. More detailed review of the radar system is given by  
135 Chen et al. (2016).

136 Here only the low mode echo power measurements are used to determine the RT  
137 height. Although the designed detectable range of the low mode is from 2.5~12 km,  
138 the vertically pointed beam can receive stronger echoes from a higher level (~14-15 km)  
139 as compared with those from off-vertical beams due to the partial specular reflection  
140 mechanism. The measurements in middle mode are also applied to calculate the winds  
141 or echo power within ~5-6 km of the tropopause. The parameters for the two routine  
142 operation modes are listed in Table 1. The monthly total number of the echo power  
143 profiles available in vertical beam (low mode) is shown in Fig. 1. The outliers or  
144 severely contaminated data that mainly induced by system problems are eliminated.  
145 The large data gap in September is due to the annual preventive maintenance.

## 146 **2.2. Tropopause Definitions**

147 Due to the large gradient in potential temperature, radar return power received at  
148 vertical incidence is significantly enhanced upon the transition zone of the tropopause  
149 layer. Using this characteristic, the RT height can be determined effectively by the VHF  
150 radar. Here, the RT is defined as the altitude (above 500 hPa) where the maximum  
151 vertical gradient of echo power is located (Vaughan et al., 1995; ~~Alexander et al., 2012~~  
152 [Alexander et al., 2013](#); Ravindrababu et al., 2014; Chen et al., 2018). Considering the  
153 occasional and random noise, to which the derived-RT is sensitive, the echo power  
154 profiles are smoothed by a 3-point running mean. In order to further reduce the  
155 influence of the noise, the RT definition used here need to satisfy an additional criterion:

156 the determined RT height should be continuous with the adjacent RT heights (one on  
157 each side), otherwise to search for the second peak gradient (eliminated if the second  
158 peak does not meet the additional criterion). The “continuous” here means that the  
159 discrepancy between the two successive heights (in time, 0.5-hour interval) should be  
160 <0.6 km. A typical example of the RT and LRT is illustrated in Fig. 2. The LRT is  
161 identified based on the World Meteorological Organization (WMO) criteria (WMO,  
162 1957). The radar aspect sensitivity is expressed as the ratio between vertical ( $p_v$ ) and  
163 oblique ( $p_o$ ) beam echo power (here is 15° east beam). The radiosonde soundings are  
164 launched twice daily from the Beijing Meteorological Observatory (39.93 °N, 116.28  
165 °E, station number 54511), which is less than 45 km to the radar site. In this case, the  
166 LRT and RT consistent well and are at 11.65 km and 11.85 km respectively. As expected,  
167 the LRT characterized by a rapid increase in potential temperature gradient also  
168 corresponds to the large gradient in radar aspect sensitivity. Note that the height with  
169 maximum value in echo power lie at a higher altitude (as compared with the RT height)  
170 of ~700 m above the LRT. The dynamical tropopauses used in this paper are derived  
171 from the European Centre for Medium-Range Weather Forecasts (ECMWF) ERA-  
172 Interim Reanalysis (Dee et al., 2011) and defined as the surface of 2 PVU potential  
173 vorticity, which is same to that used by Sprenger et al., (2003) and Alexander et al.  
174 (~~2012~~2013).

### 175 **2.3. Tropopause sharpness definition**

176 For the compared data pairs between the RT and LRT, we calculate the  
177 corresponding tropopause sharpness that represents the strength of the tropopause



178 inversion layer. As defined by Wirth, (2000), the tropopause sharpness  $S_{TP}$  can be  
 179 calculated as:

$$180 \quad S_{TP} = \frac{T_{TP+\Delta Z} - T_{TP}}{\Delta Z} - \frac{T_{TP} - T_{TP-\Delta Z}}{\Delta Z} \quad S_{TP} = \frac{T_{TP+\Delta Z} - T_{TP}}{\Delta Z} - \frac{T_{TP} - T_{TP-\Delta Z}}{\Delta Z}$$

181 (1)

182  
 183 where TP denotes the tropopause height,  $\Delta Z = 1 \text{ km}$ , and  $T_{TP}$  indicates  
 184 the corresponding temperature. This definition is also used in Alexander et al. [2012](#)  
 185 [2013](#) and we're using it for a good comparison with our results.

186

### 187 3. Results

#### 188 3.1. High-resolution radar tropopause structure

189 The ~~fine-scale~~ height-time cross section of radar echo power and aspect sensitivity  
 190 is shown in Fig. 3 for a typical month (February 2014), along with the RT, PVT and  
 191 LRT marked in the figure. In general, the RT agreed well with both the LRT and PVT  
 192 in height, and most of the RT exhibit a slightly higher altitude. However, the differences  
 193 between the RT and LRT are sometimes large (reach to ~1-2 km) especially when the  
 194 RT experience rapid change. Regardless of the background synoptic condition, the  
 195 difference in the definitions themselves is to a large degree the main contributing factor  
 196 for the large difference between the RT and LRT. For example, a second layer with  
 197 significant enhanced echo power is observed above the radar-derived RT for the cases  
 198 on 4 and 5 February 2012 (Fig.3a). According to the definitions, the RT is well defined  
 199 as the first layer with with echo-enhanced echo power and the LRT matched the second

200 layer, similar to that observed by Yamamoto et al., (2003) and Fukao et al., (2003). It is  
201 of note that the RT well separates the troposphere characterized by low aspect  
202 sensitivity from the lower-stratosphere characterized by high aspect sensitivity (Fig.3b).

### 203 **3.2. Comparisons between different definitions**

204 To further quantify the consistency and difference in altitude between different  
205 tropopause definitions, a detailed comparison is carried out in this section. The seasonal  
206 scatterplots for RT versus LRT and the histogram distribution of altitude differences  
207 between the RT and LRT are illustrated in Fig. 4, during the period November 2011-  
208 May 2017. A total of 2411 data pairs are obtained for comparison. Among them, the  
209 number of data pairs is 845 for DJF (winter), 721 for MAM (spring), 321 for JJA  
210 (summer), and 524 for SON (autumn). Comparisons have shown a good consistency  
211 throughout the seasons and most of the RTs exhibit a slightly higher than the LRTs. The  
212 correlation coefficient is 0.74, 0.80, 0.82, and 0.78 for DJF, MAM, JJA, and SON,  
213 respectively. The mean and standard deviation difference (RT minus LRT) calculated  
214 in DJF, MAM, JJA, and SON is  $(0.14 \pm 0.75)$ ,  $(0.26 \pm 0.78)$ ,  $(0.33 \pm 0.56)$ , and  
215  $(0.12 \pm 0.69)$  km, respectively. The proportion of the data pairs with differences  $<500$  m  
216 is reasonably good during four seasons and is 63%, 61%, 64%, and 67% for DJF, MAM,  
217 JJA, and SON, respectively. Fig. 4 explicitly indicates the good capability shows that  
218 the RT derived by of the Beijing MST radar to determine agrees reasonably well with  
219 the tropopause structure well LRT throughout the seasons.

220 To examine the potential role of the sharpness, Fig. 5a and Fig. 5b show the  
221 histogram distribution of the tropopause sharpness along with the probability density

222 curve for data pairs with difference (absolute values of RT minus LRT)  $<0.5$  km and  $>1$   
223 km respectively. What is apparent is that most data pairs of Fig. 5a are located to the  
224 right (higher sharpness values, with the peak of  $\sim 7.06$  K/km) and of Fig. 5b are to the  
225 left (lower sharpness values, with the peak of  $\sim 6.35$  K/km). No matter whether this  
226 distribution feature is associated with the cyclonic-anticyclonic systems (e.g. Randel et  
227 al., 2007; Randel and Wu, 2010), the results more or less demonstrate that the larger  
228 (weaker) tropopause sharpness contribute to lower (higher) difference between the RT  
229 and LRT. From the perspective of seasonal statistics, the tropopause sharpness over  
230 Beijing station shows similar distribution characteristics throughout the seasons (not  
231 shown), which is different from that in polar regions where the sharpness is significantly  
232 higher during summer than during winter (Zänagl and Hoinka, 2001).

233 The seasonal scatterplots and height difference distribution between the RT and  
234 PVT are illustrated and quantified in Fig. 6. The total number of comparing data pairs  
235 for winter, spring, summer, and autumn is 1422, 1260, 791, and 1145, respectively.  
236 During winter and spring (Fig. 6a and 6b), the RTs agree reasonably well with the PVTs  
237 with the correlation coefficient of 0.72 and 0.76 and the mean difference (RT minus  
238 PVT) of  $(0.55 \pm 0.84$  km) and  $(1 \pm 0.89$  km), respectively. In contrast, the consistency  
239 for summer and autumn (Fig. 6c and 6d) is relatively bad and with correlation  
240 coefficient of 0.33 and 0.47 and mean difference of  $(0.80 \pm 1.39$  km) and  $(0.75 \pm 1.23$   
241 km), respectively. Especially for summer, the proportion of the comparing data pairs  
242 with difference  $<0.5$  km is only 10.6% (84). In autumn, need to note that most data pairs  
243 with poor consistency is sampled during early autumn.

### 3.3. Observational characteristics in the vicinity of the tropopause

Measurements of radar middle mode are used for examining the horizontal wind, return power, and effective wind data acquisition rate within 5-6 km of the tropopause (upper troposphere and lower stratosphere). Left panels of Fig. 7 show the vertical scatterplots of the static stability (represented by the buoyancy frequency squared) as a function of height relative to the LRT and the right panels show the radar echo power as a function of height relative to the RT, during two specific years 2012-2013 for extended winter NDJFM and summer MJJAS seasons. Mean and standard deviations are also plotted in each panel of Fig. 7. As expected, Results-results clearly demonstrate ~~theshow~~ sudden jump in static stability and ~~rapid increase in echo-radar~~ power ~~upon~~ near the ~~corresponding~~ tropopause layer. The degree of sudden increasevariation in echo power is more gradual than that in static stability. The amplitude of both the jump ~~and~~ the sudden increase in radar power experienced a slightly larger during NDJFM than that during MJJAS (red lines of right panels). Another interesting feature in the lower-stratosphere is that both the static stability and radar power points show less disperse during NDJFM than that during MJJAS.

Fig. 8 shows the profiles of mean radar effective wind data acquisition rate for low and middle modes during November 2011-May 2017. Clearly, both Here, the “effective data” of one specific range gate requires at least three non-coplanar beams have received backscattered echoes, by which 3-dimensional wind can be derived. The mean data acquisition rate pprofiles both exhibit an obvious inversion layer (i.e. a sudden increase significantly with height) near the tropopause, with the first peak located ~1

266 km higher above the mean tropopause height. Note that the second inversion in middle  
267 mode profile that occurred near 16 km is associated with the second tropopause. As  
268 limited by the highest detectable altitude (the data acquisition rate decreased to lower  
269 than 20% at ~16 km), the profile in low mode shows little evidence of second inversion.

270 Fig. 9 shows time-height intensity plot of the monthly mean radar-derived  
271 horizontal wind (from middle mode) during November 2011-May 2017, together with  
272 the monthly mean location of RT and LRT. One pixel grid denotes 1 month×0.6 km.  
273 The monthly mean RT and LRT agreed well with each other in height, within 400 m in  
274 August and September and even lower in other months of about within 200 m. They  
275 both exhibit a clear seasonal variation, with maximum in early autumn of ~11.6 km and  
276 minimum in early spring of ~10.3 km. The monthly mean wind jet varies with season,  
277 with the thinnest thickness and lowest strength in summer. The mean tropopause height  
278 appears to correspond to the lower boundary location of peak wind layer. The error bars  
279 of both the RT and LRT help to illustrate that the tropopauses changes by larger  
280 amplitude in winter and June than that in other months.

### 281 **3.4. Periodogram analysis of the radar tropopause**

282 High temporal resolution detection of tropopause by VHF radar have allowed us  
283 to investigate the diurnal or semidiurnal variability of the tropopause. Atmospheric tides  
284 are well known global oscillations contributing to the diurnal variation in temperature  
285 and background winds, which in turn modulate the tropopause height. With the absence  
286 of ~~high resolution~~ temperature measurements, ~~radar-derived wind~~ zonal and meridional  
287 s-winds are combined used applied to represent demonstrate the evidence of diurnal or

288 ~~semidiurnal variation in tropopause height that modulated~~ion by tidal. The frequency  
289 power spectrum of the RT height, zonal and meridional wind, calculated by means of  
290 Lomb-Scargle method (Press and Rybicki, 1989), is illustrated in Fig. 10 for two typical  
291 months: May 2015 and December 2016. The choice of Lomb-Scargle algorithm is due  
292 to the presence of data gaps (~2 days per week, especially during 2012-2013). The  
293 dominant ~24 h periodicity in RT height, zonal and meridional wind is obvious for both  
294 months. The evidence of ~12 h period in all three parameters is distinct for May 2015  
295 (Fig. 10a), although the power is relatively weaker. Through the analysis for each  
296 individual month, we found that the semidiurnal component in the three parameters is  
297 generally and occasionally observed in summer and later spring during our  
298 experimental period. The characteristics of the diurnal variation of the RT height can  
299 be represented better in Fig. 11, which shows the mean Lomb-Scargle power spectrum  
300 of the RT as a function month during November 2011-May 2017. As compared with  
301 other months, the dominant diurnal periodicity is less evident in April. We need to  
302 clarify that atmospheric tides are of course not the only source of the diurnal variation  
303 in tropopause height, diurnal convective activities (Yamamoto et al., 2003) might also  
304 be an important cause. Here will not be ~~detailly~~discussed in detail.

305

#### 306 **4. Discussion**

307 As for the radar echo power definition, the RT estimation sometimes will fail due  
308 to the system problems, even if the thermal tropopause is well defined (Hall et al., 2009).

309 Apart from the system problems (e.g. the damage of T/R module), the following two

310 conditions are primarily responsible for the failure (or difficulty) of both the radar and  
311 thermal definitions over the radar site latitude ( $\sim 40^\circ$  N). Firstly, the temperature  
312 sometimes continued to decrease ~~upon into~~ until to the the lower stratosphere (~~below~~  
313 above 16 km) in summer and early autumn, leading to the failure/difficulty of both the  
314 radar and thermal definitions (a typical case as shown in Fig. 12a). Need to note that  
315 the temperature inversion layer occurred at  $\sim 16$  km in summer or early autumn is the  
316 second tropopause with characteristics of Tropics (Pan et al., 2004; Randel et al., 2007).  
317 Secondly, some specific meteorological processes can lead to the ambiguities and  
318 indefiniteness in thermal and radar definitions, such as fronts, cyclones or typhoons,  
319 and folding (e.g. Nastrom et al., 1989; May et al., 1991; Roettger, 2001; Alexander et  
320 al., 2013). Such ambiguities often result in large difference in altitude between the RT  
321 and LRT. ~~Especially~~ In addition, when multiple temperature inversion layers occurred  
322 (below 16 km), the RT ~~generally~~ sometimes matched the lower layer part with enhanced  
323 echo power and LRT often matched the upper part layer (e.g. Yamamoto et al., 2003;  
324 Fukao et al., 2003), ~~such as the double layers of enhanced echo power shown in Fig. 3~~  
325 ~~on 4 and 5 February 2012~~. Apart from the ~~two~~ situations above, ~~there is another~~  
326 condition that is also commonly responsible for the difficult in identifying the thermal  
327 tropopause from radiosonde profiles during summer failure of thermal definition in  
328 summer and early autumn. As ~~the a~~ typical case shown in Fig. 12b, a significant  
329 inversion in temperature (at  $\sim 12$  km) is recorded from the radiosonde profile, but ~~this~~  
330 the altitude extent of inversion layer is too thin to meet the WMO criterion inversion  
331 layer is too thin and weak to meet the WMO criterion that thermal definition required.

332 Whereas, the apparent enhancement in radar echo power corresponding to such  
333 inversion layer is strong enough to well define the RT. ~~Need to highlight again that t~~The  
334 temperature inversion ~~layer~~located near ~16 km (the second tropopause) that occurred  
335 ~~near ~16 km is the second tropopause (is not considered here the focus of this paper).~~  
336 ~~The conditions mentioned above are the main reasons for fewer comparison data pairs~~  
337 ~~in summer than that in other seasons (Fig. 4c and Fig. 6c).~~

338 Pan et al., (2004) have reported that the difference between the LRT and PVT are  
339 more distinct in the vicinity of subtropical jet. In the northern hemisphere, the axis of  
340 the subtropical jet is situated near ~30°N in spring and winter, whereas in summer and  
341 early autumn the subtropical jet shifts northward to ~40°N (see Fig. 4 in Ding and Wang,  
342 2006). We preliminary considered that the ~~bad~~inconsistency between the RT and PVT  
343 in summer and early autumn (Fig. 6c and 6d) is most likely ~~associated with~~related to  
344 the subtropical jet shifting poleward to ~40°N. ~~The existing cyclones or anticyclones in~~  
345 ~~the upper-troposphere (Wirth, 2000), of course, may also be an important~~ influence  
346 factor for the~~cause of the~~ significant asymmetric differences (most of the scattered  
347 points deviate significantly from the 1:1 line). ~~(The asymmetric differences, that is~~  
348 ~~scattered points deviate significantly from the 1:1 line and PVT located below the RT~~  
349 ~~in most cases~~most of the RT are located higher than the 2PVU tropopause height, as  
350 shown in Fig. 6c), suggest that the 2PVU surface is not the best measure of a dynamical  
351 tropopause over Beijing during summer-time. More detailed discussion about the  
352 striking asymmetric differences in height between LRT and PVT can be seen in Wirth  
353 (2001) and will not be given here. Anyway, we need to be careful when using the 2PVU



354 dynamical definition to define the tropopause over radar site latitude  $\sim 40^\circ$  N, especially  
355 in summer.

356 About the characteristics of tropopause and the comparison between different  
357 definitions, there are many differences between mid-latitude and polar regions. In mid-  
358 latitude ( $\sim 40^\circ$ N), our results show that: (1) the agreement between RT and LRT is  
359 similar good throughout the seasons; (2) RTs are generally located higher than the LRT;  
360 (3) the thermal definition sometimes fail in summer and early autumn; (4) the  
361 agreement between the RT/LRT and PVT in summer is poor. Whereas, in contrast,  
362 previous researches about the tropopause over polar regions ~~showed~~reported that  
363 (Wirth, 2000; ~~Alexander et al., 2012~~ Alexander et al., 2013): (1) the difference between  
364 the RT and LRT is larger during winter than that during summer; (2) RTs are generally  
365 located lower than the LRT; (3) the thermal definition sometimes fail in winter and  
366 spring; (4) the comparison between the RT and PVT showed the similar good agreement  
367 during both summer and winter.

368 Over a polar latitude station, the seasonal characteristics of the diurnal oscillation  
369 in tropopause height were investigated using 5 years of SOUSY VHF radar  
370 measurements (Hall, 2013b). The sunlight variability in polar regions is different from  
371 that in other latitudes of the world. Different sunlight variation actually will lead to  
372 difference in atmospheric tides, and then would result in different diurnal variation in  
373 tropopause height. Here we found that the diurnal oscillation of RT height at Xianghe  
374 is ubiquitous and obvious throughout the seasons except for April (Fig. 11). Whereas at  
375 polar latitude and in months of November to February when there is no sunlight, Hall

376 (2013b) observed little evidence of 24 h diurnal variability in RT height.

377

## 378 5. Conclusions

379 In this paper, we present the high resolution structure and variability of the  
380 tropopause in Xianghe, China (39.75° N, 116.96° E), based on the Beijing MST radar  
381 vertical beam echo power data collected during the period November 2011-May 2017.  
382 Fine-scale structure of the RT is well determined with a high temporal resolution of 0.5  
383 h. Comparison results have shown good agreement in altitude between the RT and LRT,  
384 with a correlation coefficient of  $\geq 0.74$  for the four seasons. Higher tropopause  
385 sharpness seems to contribute lower difference between the RT and LRT in altitude and  
386 weaker sharpness appears responsible for higher difference. The agreement between  
387 the RT and PVT is relatively well in winter and spring with correlation coefficient of  
388 0.72 and 0.76 respectively, but poor during summer with a correlation coefficient of  
389 only 0.33. We initially suggested that the poor consistency between RT and PVT is  
390 associated with the subtropical jet shifting poleward to  $\sim 40^\circ\text{N}$ .

391 As expected, the sudden jump in static stability (represented by the buoyancy  
392 frequency squared) and the rapid increase in radar echo power upon the tropopause  
393 layer are clearly observed. Upon the tropopause layer, A significant inversion  
394 (increasing with height) sudden increase in effective radar data acquisition rate is also  
395 observed ~~upon the tropopause layer~~. Both the monthly mean RT and LRT height have  
396 shown a clear annual cycle. The variability and oscillation of RT height with diurnal or  
397 lower timescales is presented. Obvious diurnal variation in tropopause height, zonal

398 wind, and meridional wind is generally observed throughout the seasons, indicating the  
399 modulation most likely from the atmospheric tides. The semidiurnal variation in RT  
400 height is not so obvious and commonly observed occasionally in summer and late  
401 spring.

402

### 403 **Acknowledgment**

404 This work is funded by National Natural Science Foundation of China (NSFC grants  
405 No. 41474132 and 41722404). We acknowledge the Chinese Meridian Project for  
406 providing the MST radar data. The authors sincerely acknowledge the ECMWF for  
407 providing global reanalysis data. The MST radar data for this paper are available at  
408 Data Centre for Meridian Space Weather Monitoring Project (<http://159.226.22.74/>).  
409 The radiosonde data are publicly available from the NOAA/ESRL Database at  
410 <https://ruc.noaa.gov/raobs/>.

411

### 412 **References**

413 Alexander, S.P., Murphy, D.J., and Klekociuk, A.R.: High resolution VHF radar  
414 measurements of tropopause structure and variability at Davis, Antarctica (69° S,  
415 78° E), Atmos. Chem. Phys., 13, 3121-3132, 2013.~~Alexander, S. P., Murphy, D. J.,~~  
416 ~~and Klekociuk, A. R.: High resolution VHF radar measurements of tropopause~~  
417 ~~structure and variability at Davis, Antaretica (69° S, 78° E). Atmospheric~~  
418 ~~Chemistry and Physies, 12(10), 26173-26205, 2012.~~

419 Angell, J. K., and Korshover, J.: Quasi-biennial and long-term fluctuations in  
420 tropopause pressure and temperature, and the relation to stratospheric water vapor  
421 content. *Monthly Weather Review*, 102(1), 29-34, 2009.

422 Appenzeller, C., Holton, J. R., and Rosenlof, K. H.: Seasonal Variation of Mass  
423 Transport Across the Tropopause. *Journal of Geophysical Research*, 101(D10),  
424 15071-15078, 1996.

425 Añel, J. A., J. C. Antuña, L. de la Torre, R. Nieto, and Gimeno L.: Changes in  
426 tropopause height for the Eurasian region determined from CARDS radiosonde  
427 data. *Naturwissenschaften*, 93, 603–609, doi:10.1007/s00114-006-0147-5, 2006.

428 Bethan, S., Vaughan, G., and Reid, S. J.: A comparison of ozone and thermal tropopause  
429 heights and the impact of tropopause definition on quantifying the ozone content  
430 of the troposphere. *Quarterly Journal of the Royal Meteorological Society*,  
431 122(532), 929-944, 1996.

432 Baray, J., Daniel, V., Ancellet, G., and Legras, B.: Planetary-scale tropopause folds in  
433 the southern subtropics. *Geophysical Research Letters*, 27(3), 353-356, 2000.

434 Chen, F. L., Chen, G., Shi, C. H., Tian, Y. F., Zhang, S. D., and Huang, K. M.: Strong  
435 downdrafts preceding rapid tropopause ascent and their potential to identify cross-  
436 tropopause stratospheric intrusions, *Annales Geophysicae*, 36(5), 1403-1417,  
437 2018.

438 Chen, G., Cui, X., Chen, F., Zhao, Z., Wang, Y., Yao, Q., and Gong, W.: MST Radars  
439 of Chinese Meridian Project: System Description and Atmospheric Wind  
440 Measurement. *IEEE Transactions on Geoscience and Remote Sensing*, 54(8),

441 4513-4523, 2016.

442 Das, S. S., Jain, A. R., Kumar, K. K., and Rao, D. N.: Diurnal variability of the tropical  
443 tropopause: Significance of VHF radar measurements. *Radio Science*, 43(6), 1-14,  
444 doi:10.1029/2008RS003824, 2008.

445 Dee, D. P., Uppala, S. M., Simmons, A. J., Berrisford, P., Poli, P., Kobayashi, S. et al.:  
446 The ERA-Interim reanalysis: configuration and performance of the data  
447 assimilation system. *Quarterly Journal of the Royal Meteorological Society*,  
448 137(656), 553-597, 2011.

449 Ding, A., and Wang, T.: Influence of stratosphere-to-troposphere exchange on the  
450 seasonal cycle of surface ozone at Mount Waliguan in western China. *Geophysical  
451 Research Letters*, 33(3), 233-252, doi:10.1029/ 2005GL024760, 2006.

452 Fukao, S., H. Hashiguchi, M. Yamamoto, T. Tsuda, T. Nakamura, M. K. Yamamoto,  
453 T. Sato, M. Hagi, and Y. Yabugaki.: Equatorial Atmosphere Radar (EAR):  
454 System description and first results. *Radio Science*, 38(3), 1053, 2003.

455 Gage, K. S., and Green, J. L.: An objective method for the determination of tropopause  
456 height from VHF radar observations. *Journal of Applied Meteorology*, 21(21),  
457 1150-1154, 1982.

458 Gage, K. S., and Green, J. L.: Tropopause Detection by Partial Specular Reflection with  
459 Very-High-Frequency Radar. *Science*, 203(4386), 1238-1240, 1979.

460 Gettelman, A., P. Hoor, L. L. Pan, W. J. Randel, M. I. Hegglin, and T. Birner: The  
461 extratropical upper troposphere and lower stratosphere, *Reviews of Geophysics*,  
462 49(3), RG3003, doi: 10.1029/2011RG000355, 2011.

463 Hermawan, E., Tsuda, T., and Adachi, T.: MU radar observations of tropopause  
464 variations by using clear air echo characteristics. *Earth, Planets and Space*, 50(4),  
465 361-370, 1998.

466 Hall, C.: The radar tropopause above Svalbard 2008–2012: Characteristics at various  
467 timescales. *Journal of Geophysical Research*, 118(6), 2600-2608, 2013a.

468 Hall, C.: The radar tropopause at 78°N, 16°E: Characteristics of diurnal variation.  
469 *Journal of Geophysical Research*, 118(12), 6354-6359, doi:10.1002/jgrd.50560,  
470 2013b.

471 Hall, C. M., Röttger, J., Kuyeng, K., Sigernes, F., Claes, S., and Chau, J. L.: Tropopause  
472 altitude detection at 78°N, 16°E, 2008: First results of the refurbished SOUSY  
473 radar. *Radio Science*, 44(5), 1-12, doi:10.1029/2009RS004144, 2009.

474 Hoinka, K. P.: Statistics of the Global Tropopause Pressure. *Monthly Weather Review*,  
475 126(12), 3303-3325, 1998.

476 Hoskins, B. J., McIntyre, M. E., and Robertson, A. W.: On the use and significance of  
477 isentropic potential vorticity maps. *Quarterly Journal of the Royal Meteorological*  
478 *Society*, 111(470), 877-946, 2007.

479 Huang, C., Zhang, S. D., Zhou, Q. H., Yi, F., Huang, K., Gong, Y., Zhang, Y., and Gan,  
480 Q.: WHU VHF radar observations of the diurnal tide and its variability in the lower  
481 atmosphere over Chongyang (114.14° E, 29.53° N), China. *Annales Geophysicae*,  
482 33(7), 865-874, 2015.

483 Hoerling, M. P., Schaack, T. K., and Lenzen, A. J.: Global Objective Tropopause  
484 Analysis. *Monthly Weather Review*, 119(8), 1816-1831, 1991.

485 Liu, Y., Xu, T., and Liu, J.: Characteristics of the seasonal variation of the global  
486 tropopause revealed by cosmic/GPS data. *Advances in Space Research*, 54(11),  
487 2274-2285, 2014.

488 May, P. T., Yamamoto, M., Fukao, S., Sato, T., Kato, S., and Tsuda, T.: Wind and  
489 reflectivity fields around fronts observed with a VHF radar. *Radio Science*, 26(5),  
490 1245-1249, 1991.

491 Nastrom, G. D., Green, J. L., Gage, K. S., and Peterson, M. R.: Tropopause Folding  
492 and the Variability of the Tropopause Height as Seen by the Flatland VHF Radar.  
493 *Journal of Applied Meteorology*, 28(12), 1271-1281, 1989.

494 Nielsen-Gammon, J. W.: A visualization of the global dynamic tropopause. *Bulletin of*  
495 *the American Meteorological Society*, 82(6), 1151-1168, 2001.

496 Pan, L. L., Randel, W. J., Gary, B. L., Mahoney, M. J., and Hints, E. J.: Definitions  
497 and sharpness of the extratropical tropopause: A trace gas perspective. *Journal of*  
498 *Geophysical Research*, 109, D23103, doi:10.1029/2004JD004982, 2004.

499 Pan, L. L., W. J. Randel, J. C. Gille, W. D. Hall, B. Nardi, S. Massie, V. Yudin, R.  
500 Khosravi, P. Konopka, and D. Tarasick: Tropospheric intrusions associated with  
501 the secondary tropopause, *Journal of Geophysical Research*, 114, D10302, 2009.

502 Press, W. H., and Rybicki, G. B.: Fast algorithm for spectral analysis of unevenly  
503 sampled data. *The Astrophysical Journal*, 338(1), 277-280, 1989.

504 Ravindrababu, S., Venkat Ratnam, M., Sunilkumar, S. V., Parameswaran, K., and  
505 Krishna Murthy, B. V.: Detection of tropopause altitude using Indian MST radar  
506 data and comparison with simultaneous radiosonde observations. *Journal of*

507 Atmospheric and Solar-Terrestrial Physics, 121(6), 679-687, 2014.

508 Randel, W. J., Wu, F., and Gaffen, D. J.: Interannual variability of the tropical  
509 tropopause derived from radiosonde data and NCEP reanalyses. Journal of  
510 Geophysical Research Atmospheres, 105(D12), 15509-15523, 2000.

511 Randel, W. J., Seidel, D. J., and Pan, L. L.: Observational characteristics of double  
512 tropopauses. Journal of Geophysical Research, 112, D07309, 2007.

513 Randel, W. J., and Wu, F.: The Polar Summer Tropopause Inversion Layer. Journal of  
514 the Atmospheric Sciences, 67(8), 2572-2581, 2010.

515 Randel, W. J., Wu, F., and Forster, P. M.: The extratropical tropopause inversion layer:  
516 Global observations with GPS data, and a radiative forcing mechanism. Journal of  
517 the Atmospheric Sciences, 64(12), 4489-4496, 2007.

518 Ramakrishnan, K. P.: Distortion of the tropopause due to meridional movements in the  
519 sub-stratosphere. Nature, 132(3346), 932-932, 1933.

520 Roettger, J.: Observations of the polar d-region and the mesosphere with the Eiscat  
521 Svalbard radar and the SOUSY Svalbard Radar (scientific paper). Memoirs of  
522 National Institute of Polar Research. Special Issue, 54(94), 9-20, 2001.

523 Reed, R. J.: A study of a characteristic type of upper-level frontogenesis. Journal of the  
524 Atmospheric Sciences, 12(3), 226-237, 1955.

525 Santer, B. D., Wehner, M. F., Wigley, T. M., Sausen, R., Meehl, G. A., Taylor, K. E.,  
526 Ammann, C., Arblaster, J., Washington, W. M., Boyle, J. S., and Brüggemann, W.:  
527 Contributions of anthropogenic and natural forcing to recent tropopause height  
528 changes. Science, 301(5632), 479-483, 2003.



529 Santer, B. D., Sausen, R., Wigley, T. M., Boyle, J. S., Achutarao, K., Doutriaux, C.,  
530 Hansen, J. E., Meehl, G. A., Roeckner, E., Ruedy, R., Schmidt, G., and Taylor, K.  
531 E.: Behavior of tropopause height and atmospheric temperature in models,  
532 reanalyses, and observations: Decadal changes. *Journal of Geophysical Research*,  
533 108(D1), 4002, doi:10.1029/2002JD002258, 2003a.

534 Sausen, R., and Santer, B. D.: Use of Changes in Tropopause Height to Detect Human  
535 Influences on Climate. *Meteorologische Zeitschrift*, 12(3), 131-136, 2003.

536 Schmidt, T., Heise, S., Wickert, J., Beyerle, G., & Reigber, C.: GPS radio occultation  
537 with CHAMP and SAC-C: global monitoring of thermal tropopause parameters.  
538 *Atmospheric Chemistry and Physics*, 5(6), 1473-1488, 2005.

539

540 Seidel, D. J., Ross, R. J., Angell, J. K., and Reid, G. C.: Climatological characteristics  
541 of the tropical tropopause as revealed by radiosondes. *Journal of Geophysical*  
542 *Research*, 106(D8), 7857-7878, 2001.

543 Son, S. W., Tandon, N. F., & Polvani, L. M.: The fine-scale structure of the global  
544 tropopause derived from COSMIC GPS radio occultation measurements. *Journal*  
545 *of Geophysical Research: Atmospheres*, 116(D20), 2011.

546 ~~Son, S., Tandon, N. F., and Polvani, L. M.: The fine scale structure of the global~~  
547 ~~tropopause derived from cosmic gps radio occultation measurements. *Journal of*~~  
548 ~~*Geophysical Research Atmospheres*, 116, D20113, 2011.—~~

549 Sprenger, M., Croci Maspoli, M., and Wernli, H.: Tropopause folds and cross-  
550 tropopause exchange: a global investigation based upon ECMWF analyses for the

551 time period March 2000 to February 2001. *Journal of Geophysical Research*  
552 *Atmospheres*, 108(12), 291-302, 2003.

553 Tian, Y., and Lu, D.: Comparison of Beijing MST Radar and Radiosonde Horizontal  
554 Wind Measurements. *Advances in Atmospheric Sciences*, 34(1), 39-53. doi:  
555 10.1007 / s00376-016-6129-4, 2017.

556 Vaughan, G., Howells, A., and Price, J. D.: Use of MST radars to probe the mesoscale  
557 structure of the tropopause. *Tellus A*, 47(5), 759-765, 1995.

558 Wang, C.: Development of the Chinese meridian project. *Chinese Journal of Space*  
559 *Science*, 30(4), 382–384, 2010.

560 [Wilcox L.J., Hoskins B.J., Shine K.P. 2012. A global blended tropopause based on ERA](#)  
561 [data. Part I: Climatology. Q. J. R. Meteorol. Soc. 138: 561–575.](#)  
562 [DOI:10.1002/qj.951.](#)

563 Wirth, V.: Thermal versus dynamical tropopause in upper-tropospheric balanced flow  
564 anomalies. *Quarterly Journal of the Royal Meteorological Society*, 126(562), 299-  
565 317, 2000.

566 Wirth, V.: Cyclone-anticyclone asymmetry concerning the height of the thermal and the  
567 dynamical tropopause. *Journal of the Atmospheric Sciences*, 58(1), 26-37, 2001.

568 WMO: Definition of the tropopause. *WMO Bull.*, 6, 136, 1957.

569 Yamamoto, M., Oyamatsu, M., Horinouchi, T., Hashiguchi, H., and Fukao, S.: High  
570 time resolution determination of the tropical tropopause by the Equatorial  
571 Atmosphere Radar. *Geophysical Research Letters*, 30(21), 2094, 2003.

572 Zängl, G., and Hoinka, K. P.: The tropopause in the polar regions. *Journal of Climate*,  
573 14(2001), 3117-3139, 2001.  
574

575 **Table**

| Radar parameter           | Value                                 |
|---------------------------|---------------------------------------|
| Transmitted frequency     | 50 MHz                                |
| Antenna array             | 24×24 3-element Yagi                  |
| Antenna gain              | 33 dB                                 |
| Transmitter peak power    | 172 kW                                |
| Code                      | 16-bit complementary                  |
| No. coherent integrations | 128 (low mode)/64 (mid mode)          |
| No. FFT points            | 256                                   |
| No. spectral average      | 10                                    |
| Pulse repetition period   | 160 (low mode)/320 (mid mode) $\mu$ s |
| Half power beam width     | 3.2°                                  |
| Pulse length              | 1 (low mode)/4 (mid mode) $\mu$ s     |
| Range resolution          | 150 (low mode)/600 (mid mode) m       |
| Temporal resolution       | 30 min                                |
| Off-zenith angle          | 15°                                   |

576 **Table 1.** Routine operational parameters in low and middle mode for the Beijing MST

577 radar used in this study.

578

579 **Figures**

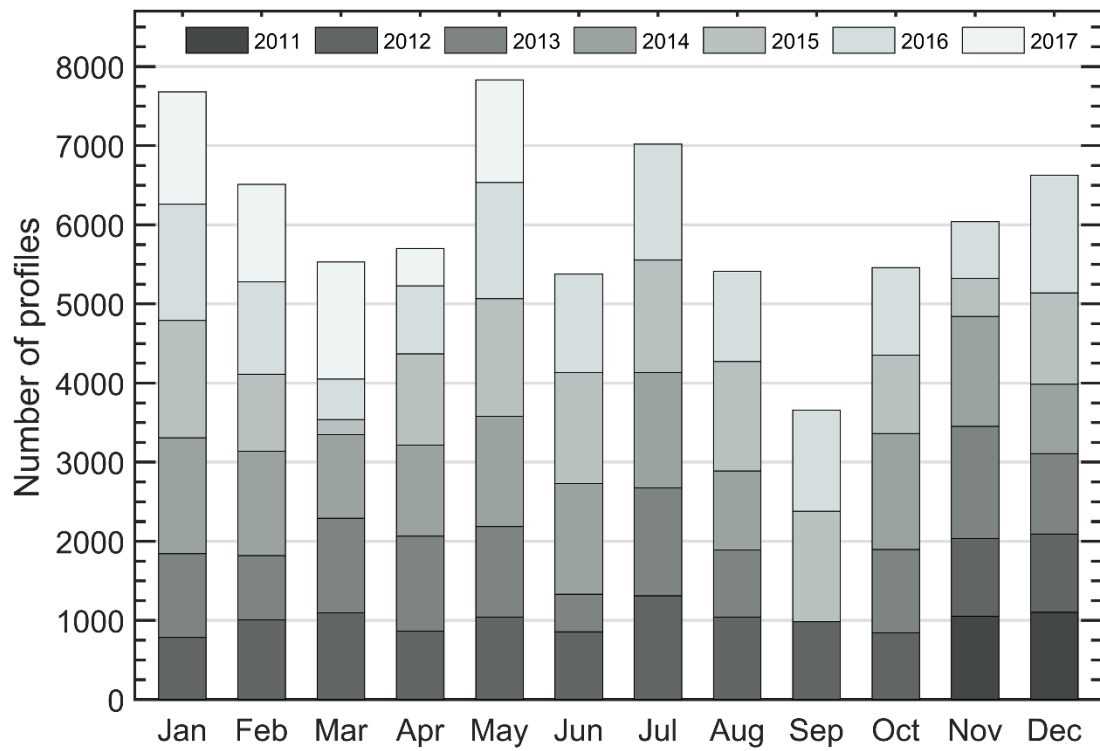

580

581 **Figure 1.** Distribution of the monthly total number of radar return echo power profiles  
582 that available from vertical beam in low mode, collected for the period November 2011-  
583 May 2017.

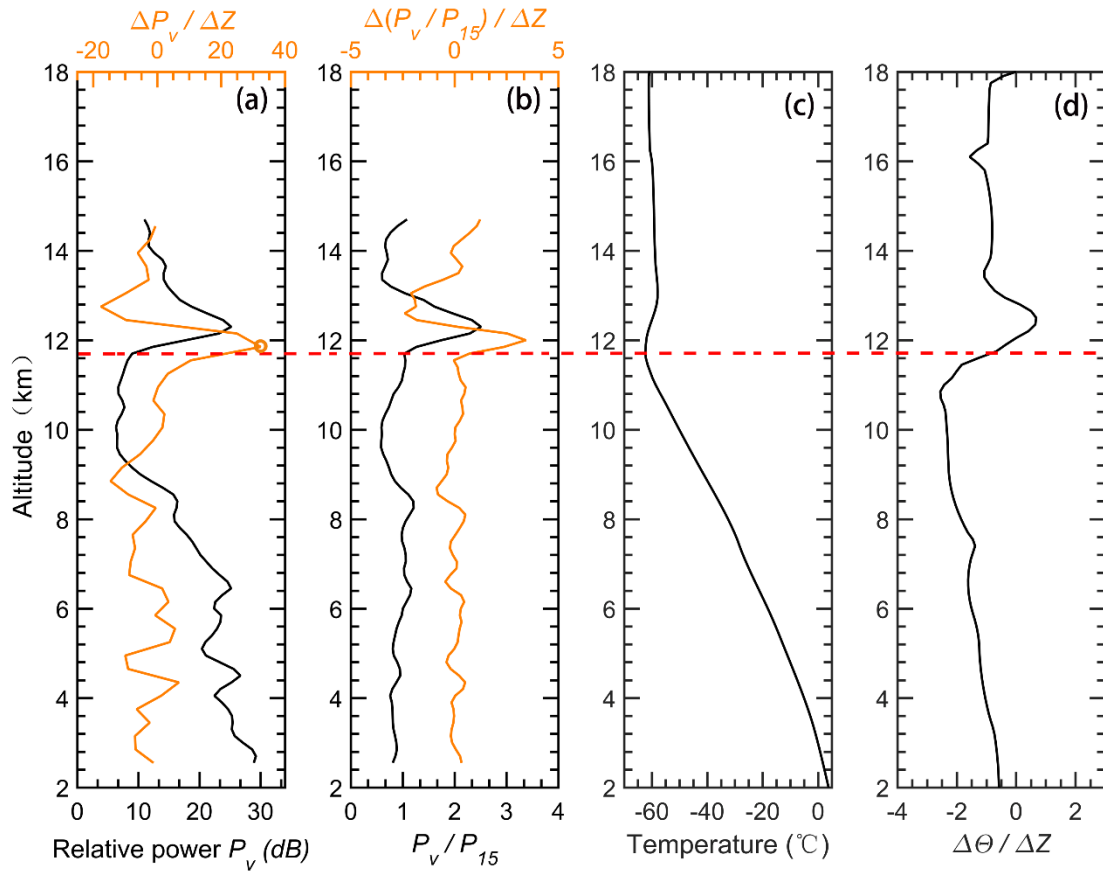

584

585 **Figure 2.** Example vertical profiles of (a) relative radar echo power (black line) along  
 586 with its gradient variation (orange line), (b) radar aspect sensitivity (black line) along  
 587 with its gradient variation (orange line), (c) radiosonde temperature and (d) potential  
 588 temperature gradient on 00 UT 04 November 2011. The horizontal red dashed line  
 589 marks the LRT height. The orange circle in Fig. 2a denotes the RT height.

590

591

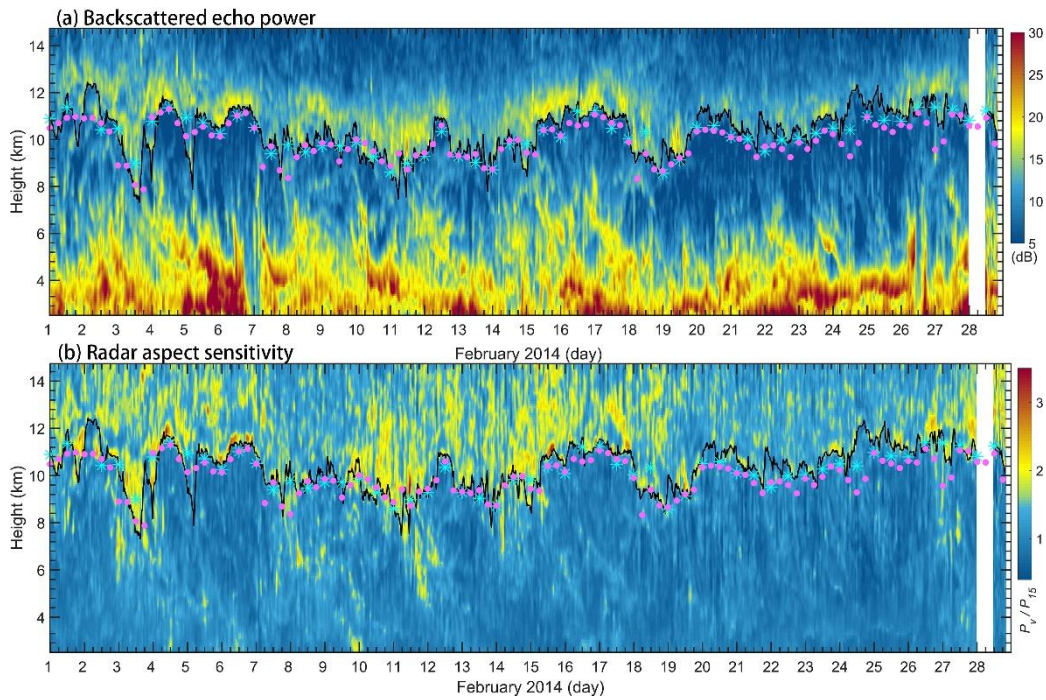

592

593 **Figure 3.** Altitude-time intensity plot of (a) radar backscattered echo power and (b)

594 radar aspect sensitivity for February 2014. The tropopause determined based on the

595 radar echo definition are shown as a black solid curve. The green-cyan asterisks ‘\*’ and

596 pink dots indicate the location of the LRT derived from simultaneous twice daily

597 radiosonde data and the PVT from ECMWF ERA-Interim reanalysis, respectively.

598 White stripe indicates the time frame of radar missing data.

599

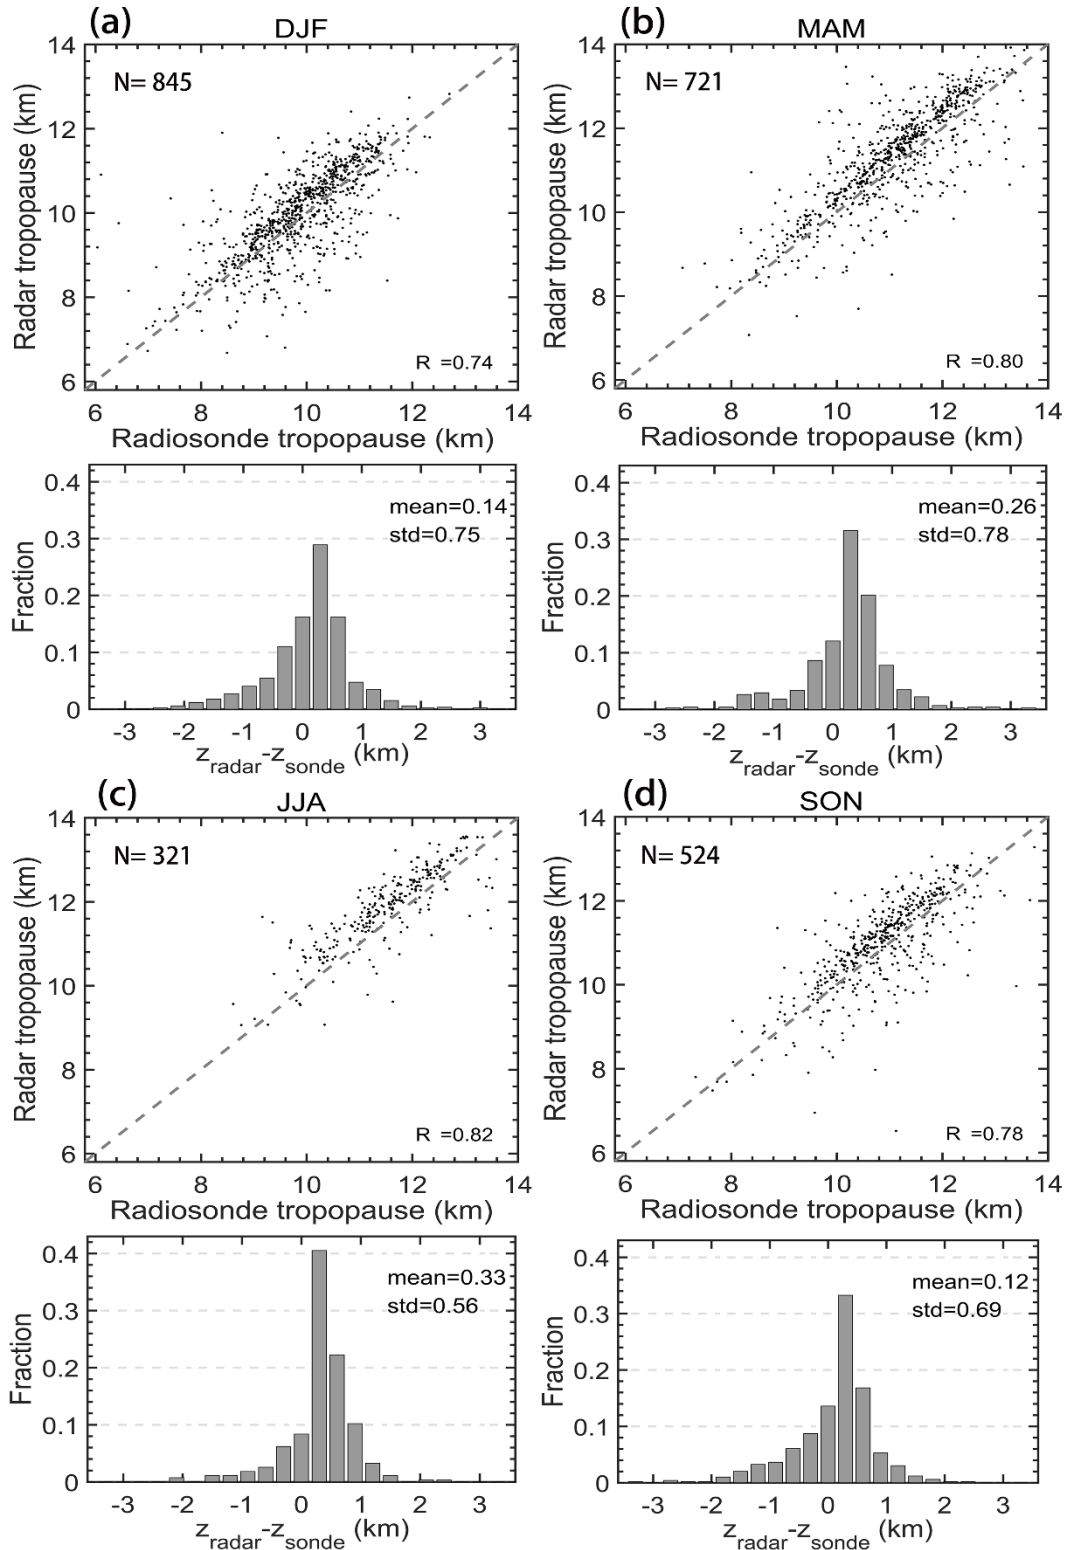

600

601 **Figure 4.** Seasonal scatterplots of the RT versus LRT and histogram distribution of

602 altitude differences between the RT and the LRT, for (a) winter DJF, (b) spring MAM,

603 (c) summer JJA, and (d) autumn SON, during the period November 2011-May 2017.



604 The positive values in the histogram indicate the RT locating at a higher level than the  
 605 LRT. The grey dashed line shows the 1:1 line. Here, 'N', 'R<sup>2</sup>', 'mean', and 'std' indicate  
 606 the sample numbers, correlation coefficient, mean difference, and standard deviation of  
 607 the difference, respectively.

608

609

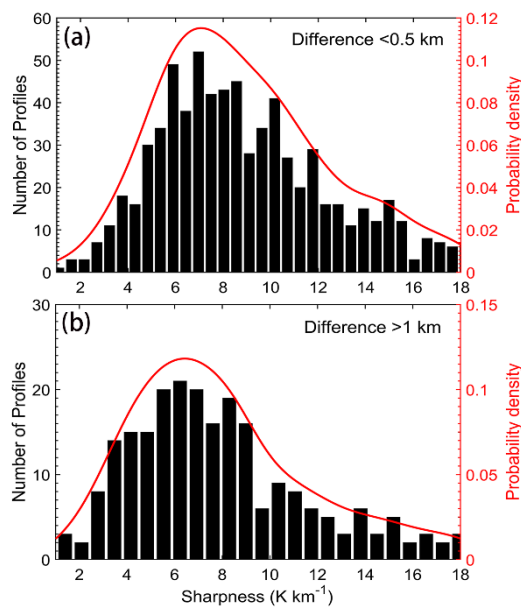

610

611 **Figure 5.** Histogram distribution of the tropopause sharpness for (a) difference < 0.5  
 612 km, and (b) > 1 km respectively between the LRT and the RT.

613

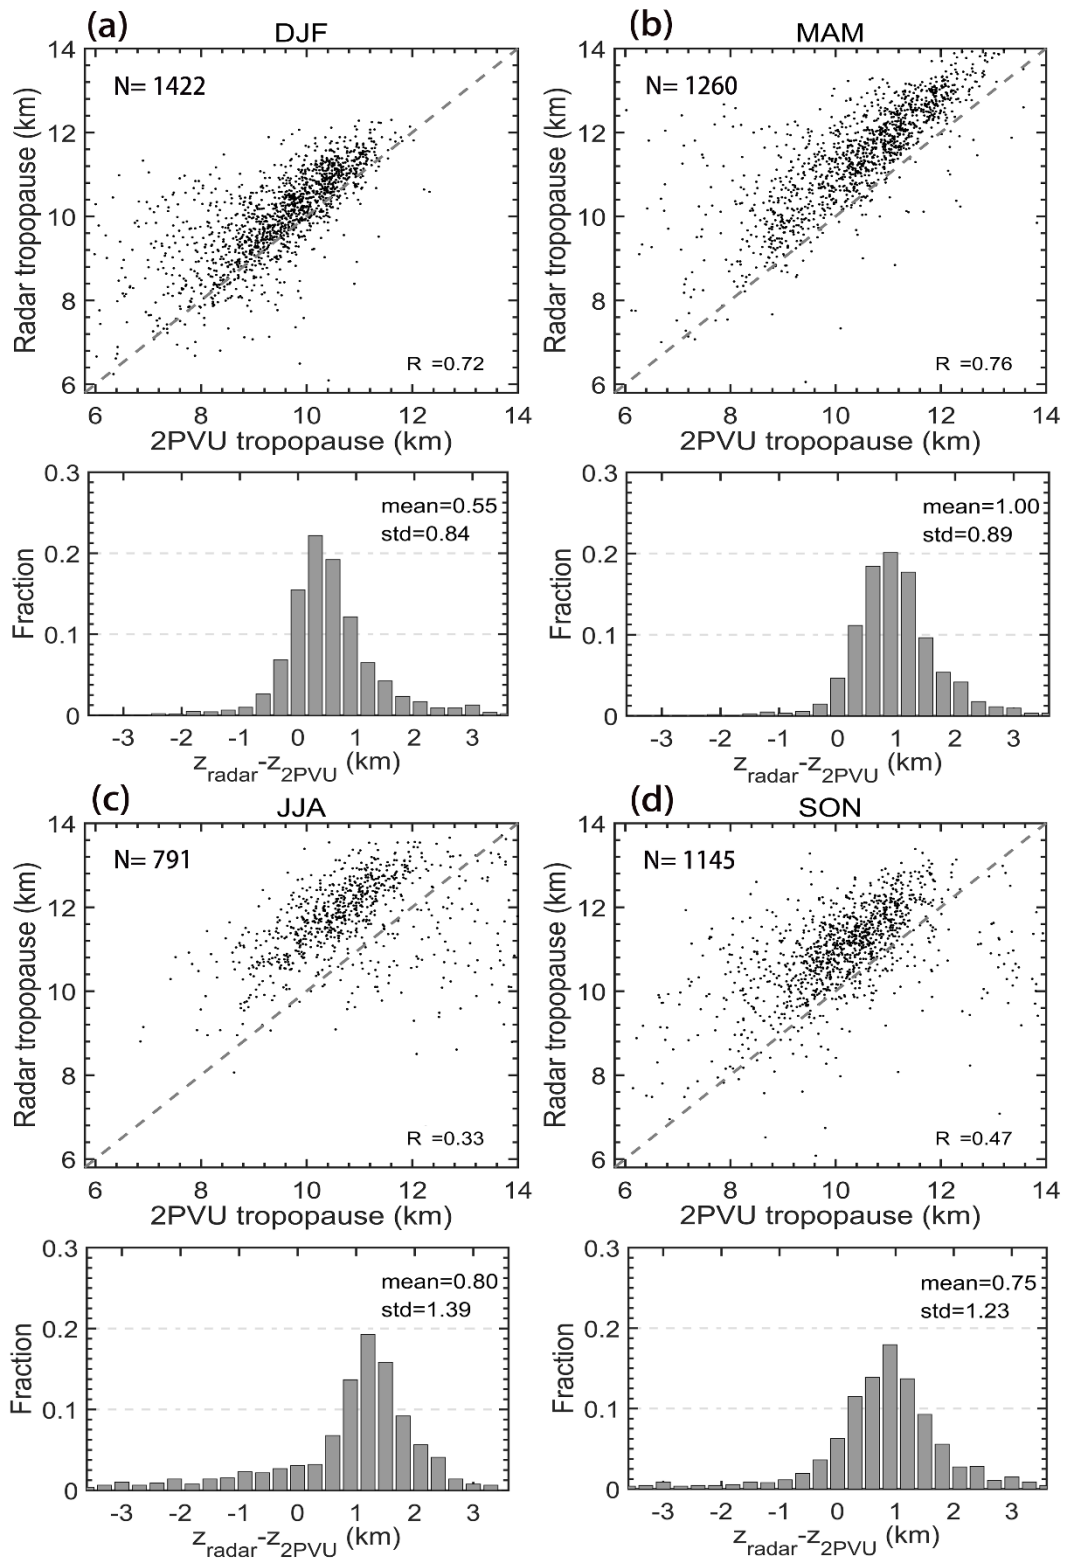

614

615 **Figure 6.** Same as figure 4, but for the comparison between the RT and the PVT.

616

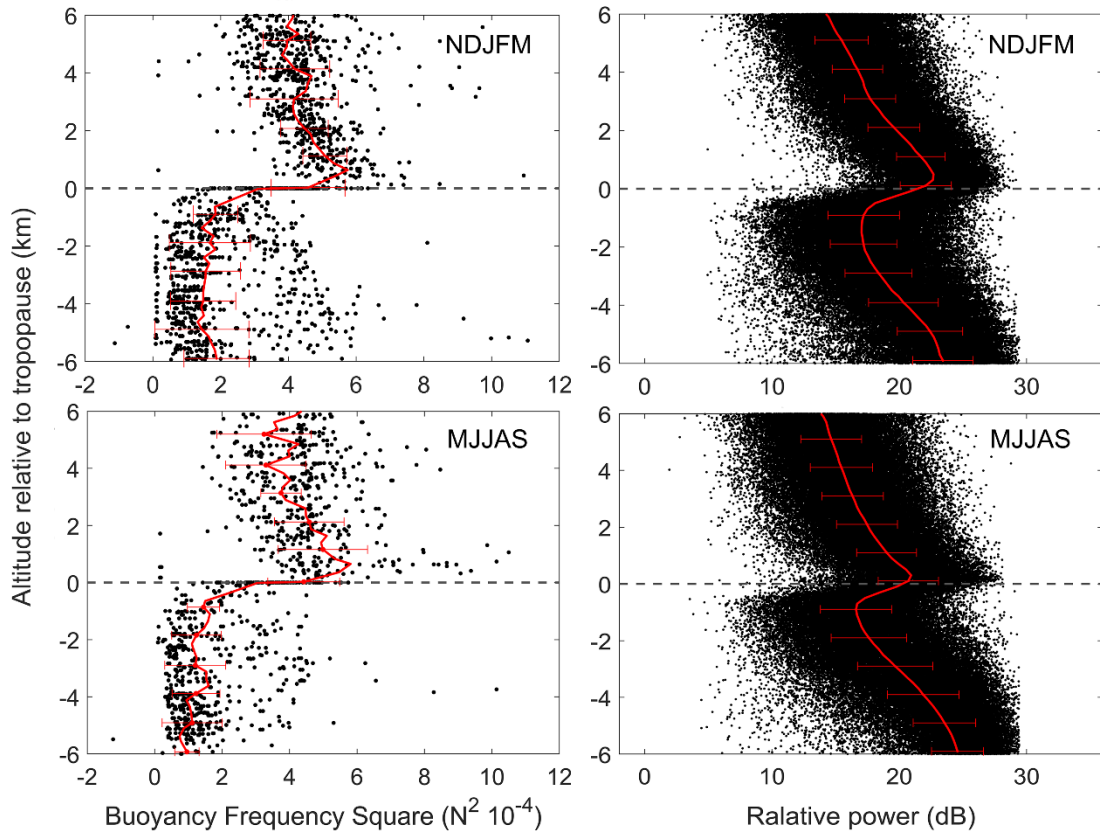

617

618 **Figure 7.** Scatterplots of (left panels) static stability ( $N^2$ ) and (right panels) radar

619 relative echo power as a function of altitude relative to the LRT (left panels) and RT

620 (right panels) for extended winter (NDJFM) and summer (MJJAS) seasons for two

621 specific years 2012-2013. Red lines in each panel denote the corresponding mean

622 profiles and the error bars indicate the standard deviations.

623

624

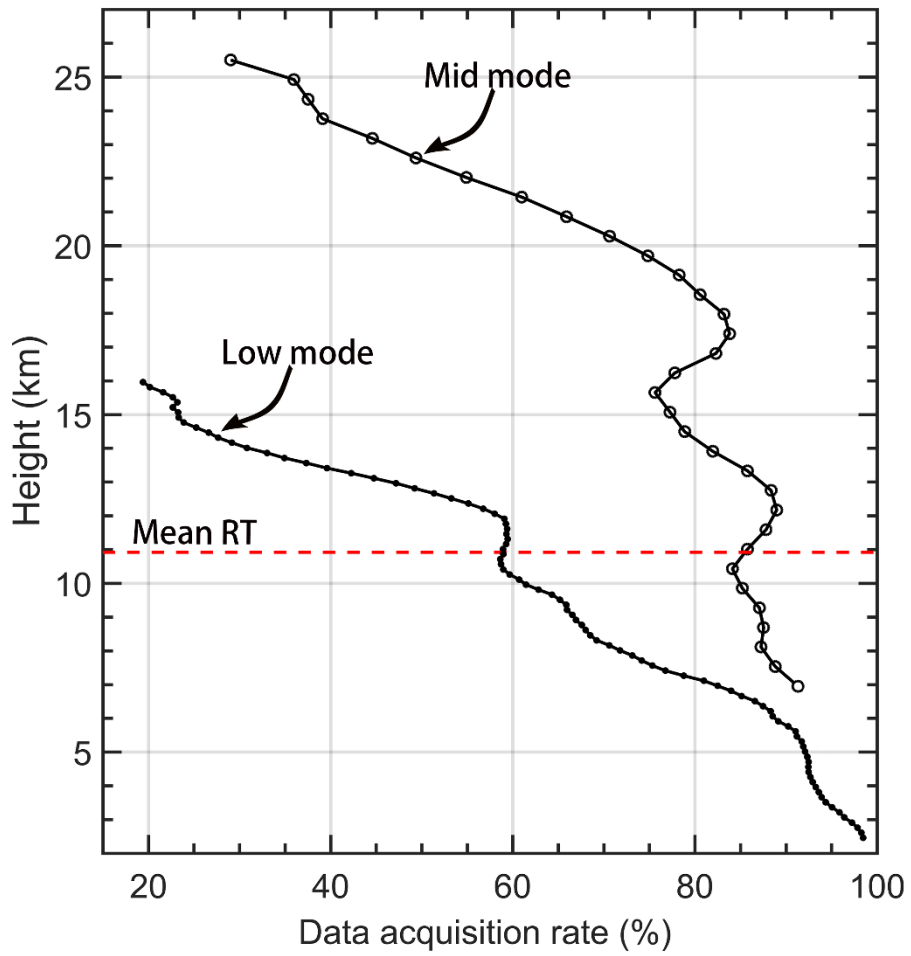

625

626 **Figure 8.** Vertical height profiles of the averaged effective radar wind data acquisition  
 627 rate in low mode and middle mode during November 2011-May 2017. The red dashed  
 628 line indicates the mean RT height.

629

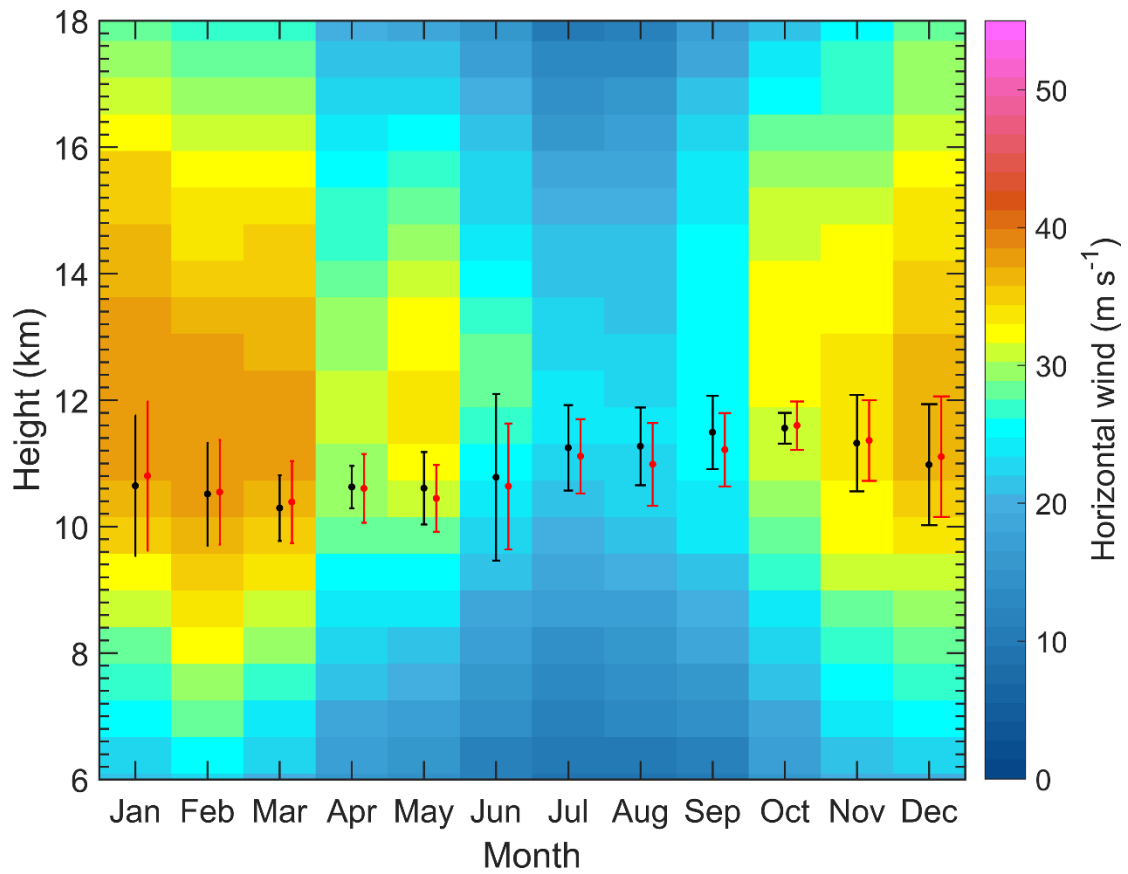

630

631 **Figure 9.** Height-time intensity map of monthly mean horizontal wind speed (shaded,

632 m/s) derived from the middle mode of Beijing MST radar, during November 2011-May

633 2017. Also shown is the monthly mean height of RT (black dots) and LRT (red dots,

634 offset by +6 days) along with the vertical error bars representing the standard deviations.

635

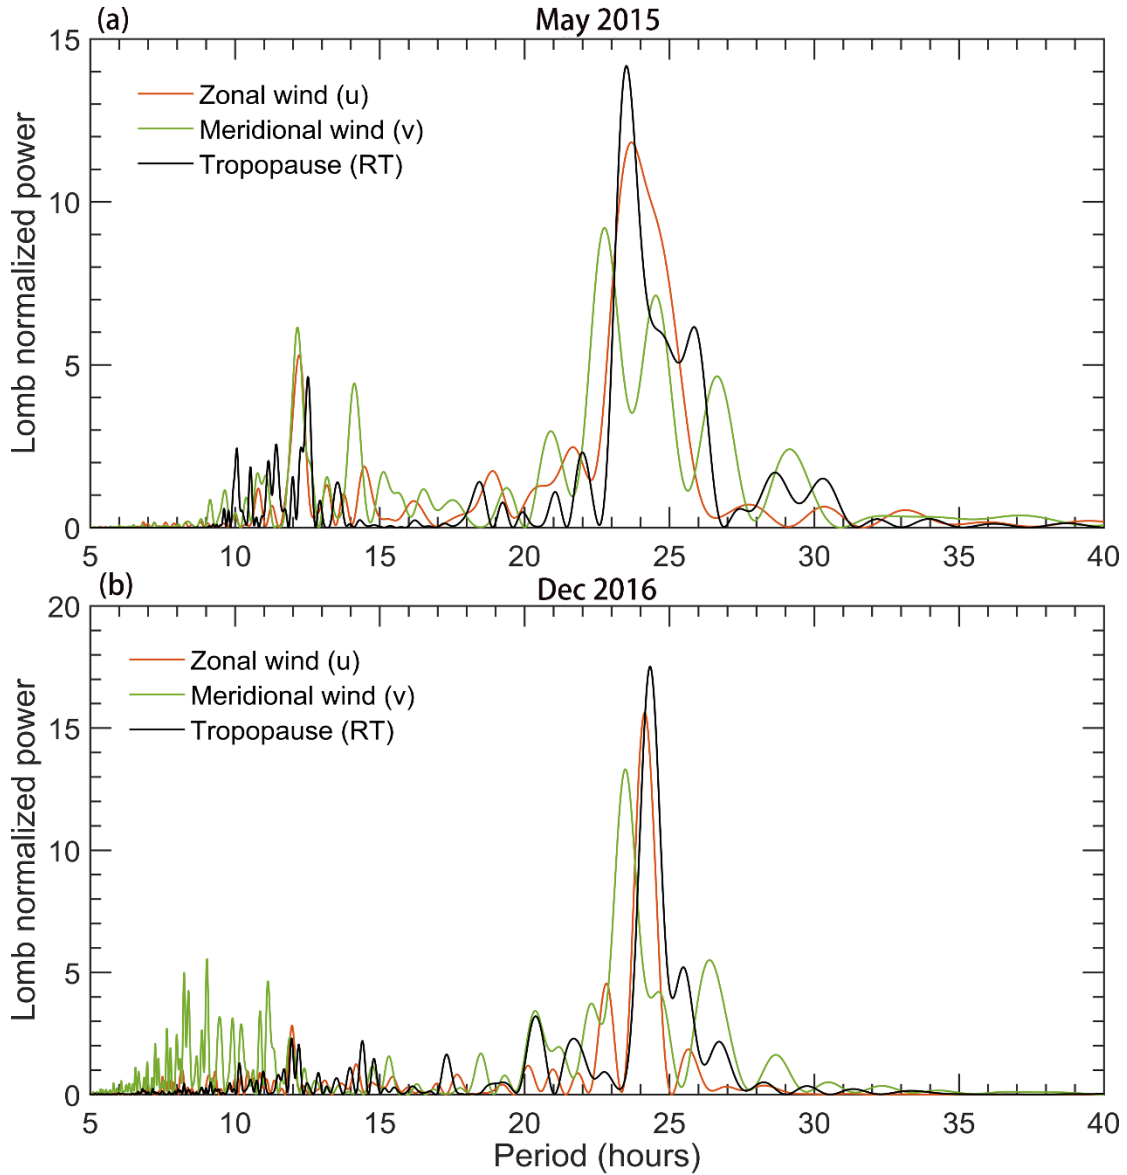

636

637 **Figure 10.** Lomb-Scargle periodograms of the RT height, zonal, and meridional wind

638 oscillations for specific months of (a) May 2015 and (b) December 2016. The zonal and

639 meridional wind for (a) is sampled at 9.85 km and (b) at 11 km.

640

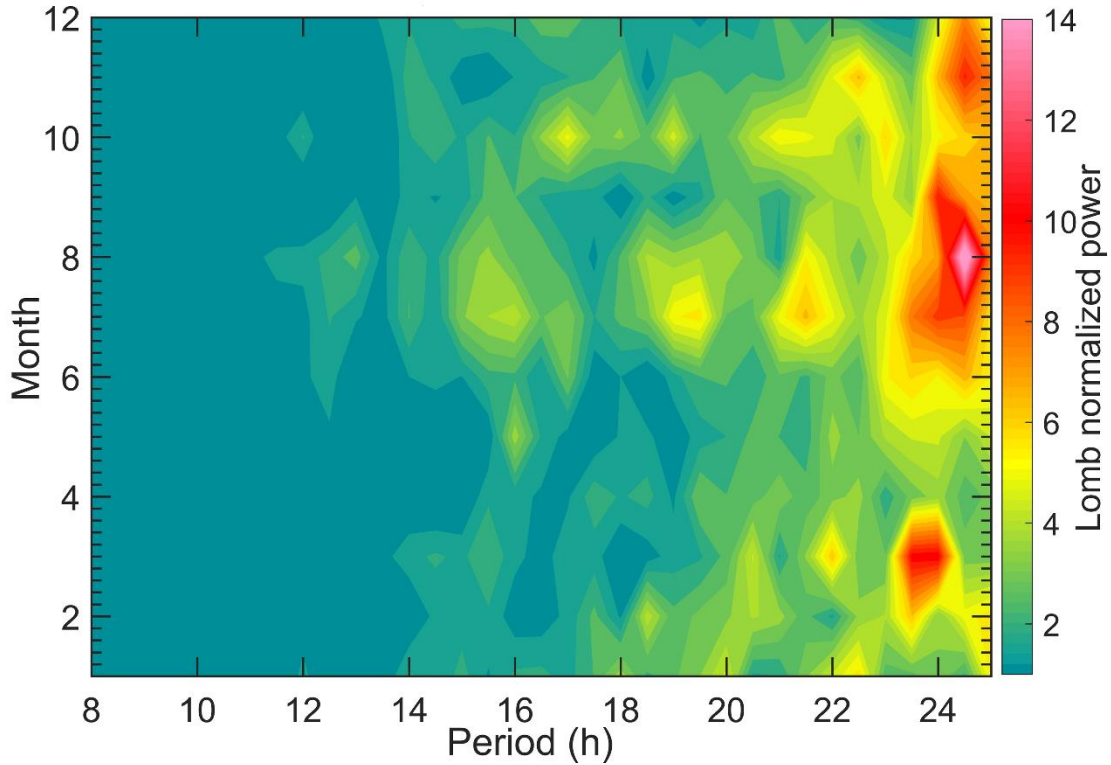

641

642 **Figure 11.** Mean Lomb-Scargle periodograms of RT height as a function of the time of

643 month during November 2011-May 2017.

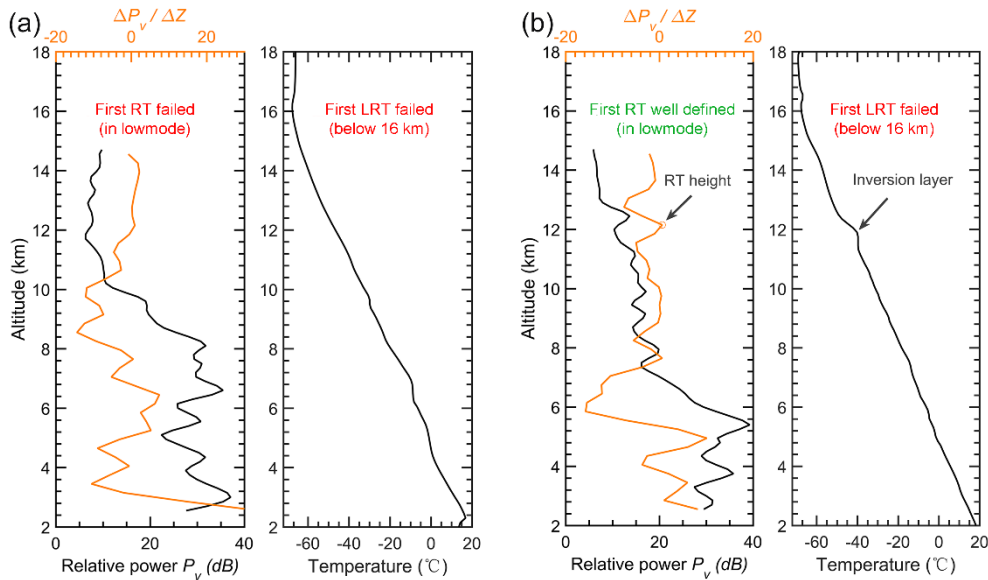

644

645 **Figure 12.** Example profiles of radar echo power and radiosonde temperature that (a)

646 both the RT and LRT definitions fail due to the continuing decrease in temperature on

647 00 UTC 7 July 2012 and (b) the temperature inversion layer failed to meet the LRT

648 definition but well defined in RT definition on 12 UTC 02 August 2012. Please note

649

that we only consider the conditions below 16 km.
